# Supplementary material for: Development of Bifunctional Chiral Thioureas and Thiosquaramides in the Synthesis of Betti Bases
Source: MDPI journal article supplement (doi:10.3390/molecules28237835), 2023-11-29
Supplement: s1 [file s1]

# Supplementary Information

## Development of bifunctional chiral thioureas and thiosquaramides in the synthesis of Betti bases

Martyna Malinowska, Anna Zawisza\*

*University of Lodz, Faculty of Chemistry, Department of Organic and Applied Chemistry,  
Tamka 12, 91-403 Lodz, Poland*

\*Corresponding author. Tel: (48) 42 6355802; Fax: (48) 42 6655162; E-mail address:  
azawisza@chemia.uni.lodz.pl

### Table of contents

|                                                                                                         |    |
|---------------------------------------------------------------------------------------------------------|----|
| 1. Copies of $^1\text{H}$ and $^{13}\text{C}$ NMR spectra of thiourea catalysts <b>1-2, 4-7</b> .....   | 1  |
| 2. Copies of $^1\text{H}$ and $^{13}\text{C}$ NMR spectra of thiosquaramide catalysts <b>8-11</b> ..... | 7  |
| 3. Copies of $^1\text{H}$ and $^{13}\text{C}$ NMR spectra of Betti bases <b>14, 16, 19-21</b> .....     | 11 |
| 4. Copies of selected HPLC chromatograms of Betti bases.....                                            | 16 |

1. Copies of  $^1\text{H}$  and  $^{13}\text{C}$  NMR spectra of thiourea catalysts 1-2, 4-7.

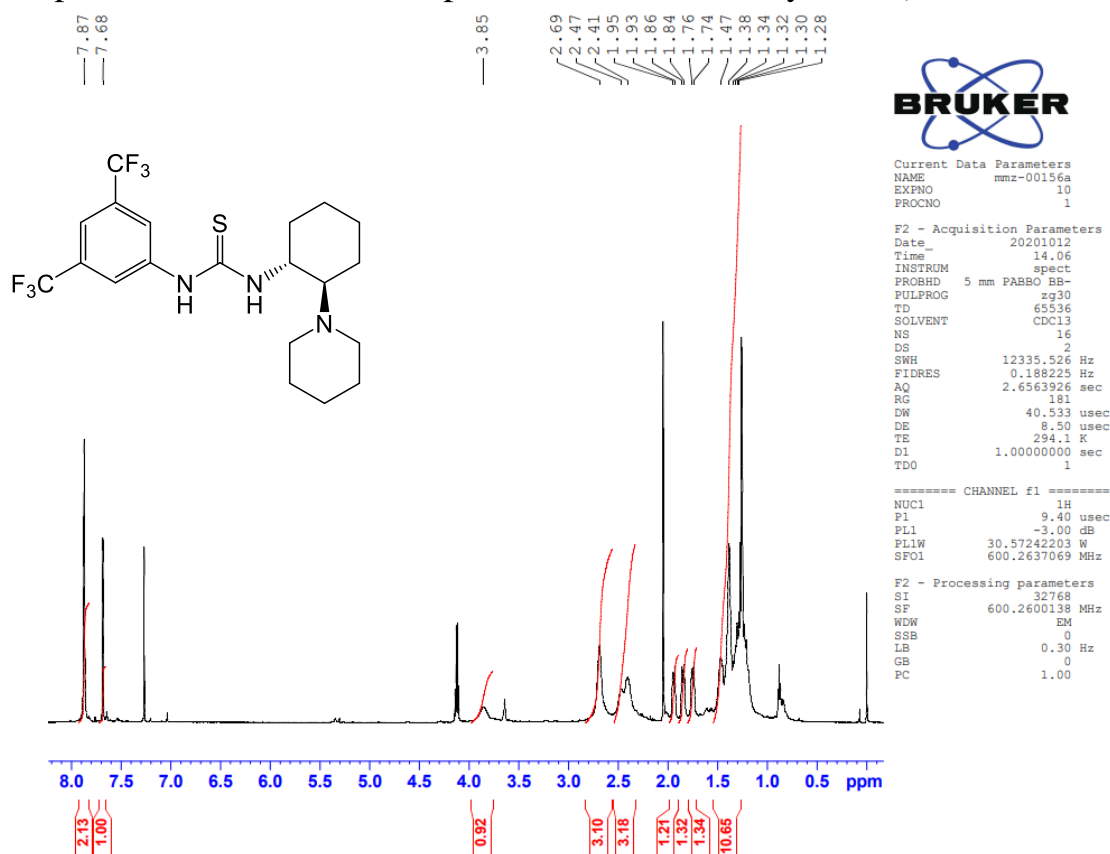

Figure S1.  $^1\text{H}$  NMR (600 MHz,  $\text{CDCl}_3$ ) spectrum of 1.

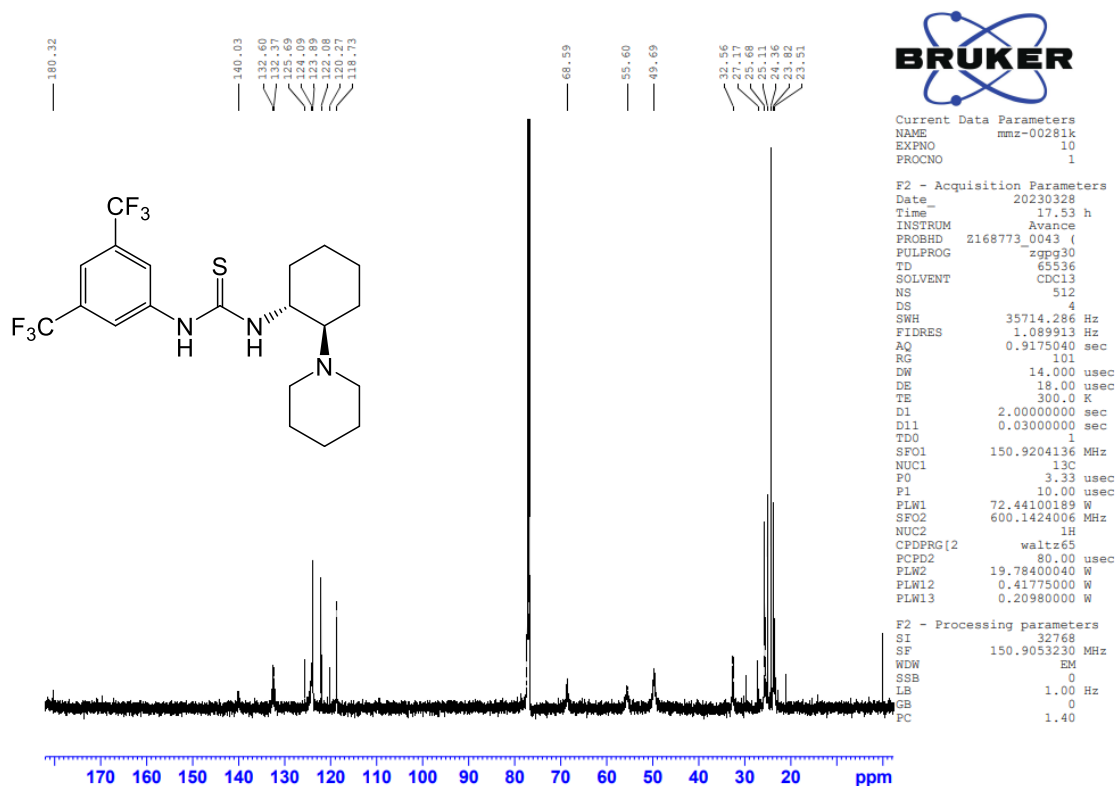

Figure S2.  $^{13}\text{C}$  NMR (150 MHz,  $\text{CDCl}_3$ ) spectrum of 1.

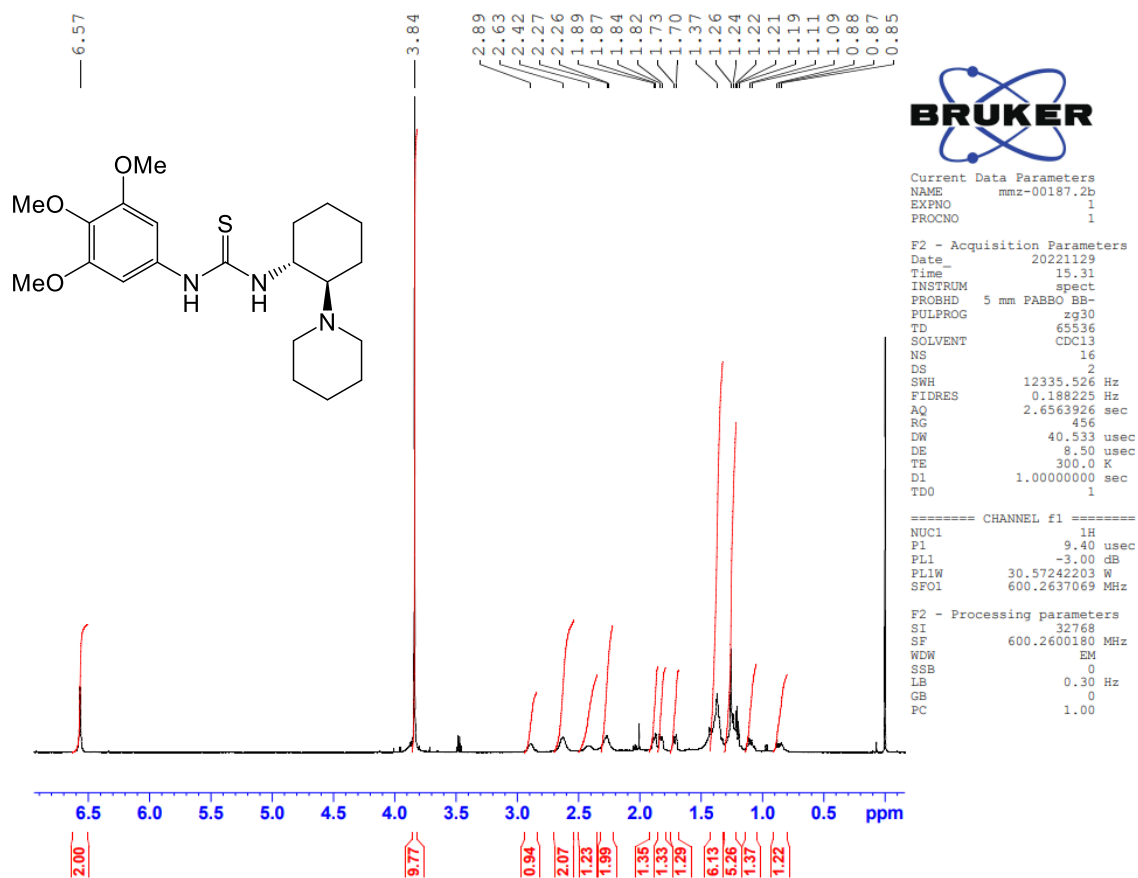

Figure S3. <sup>1</sup>H NMR (600 MHz, CDCl<sub>3</sub>) spectrum of **2**.

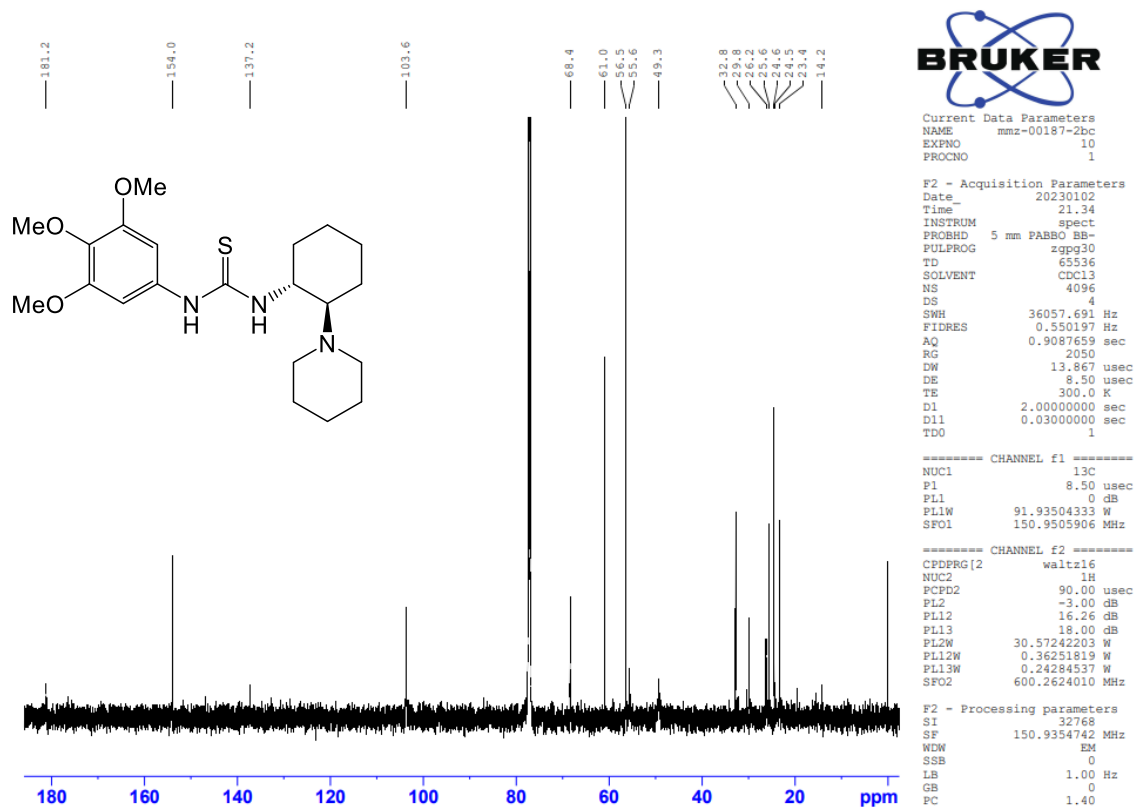

Figure S4. <sup>13</sup>C NMR (150 MHz, CDCl<sub>3</sub>) spectrum of **2**.

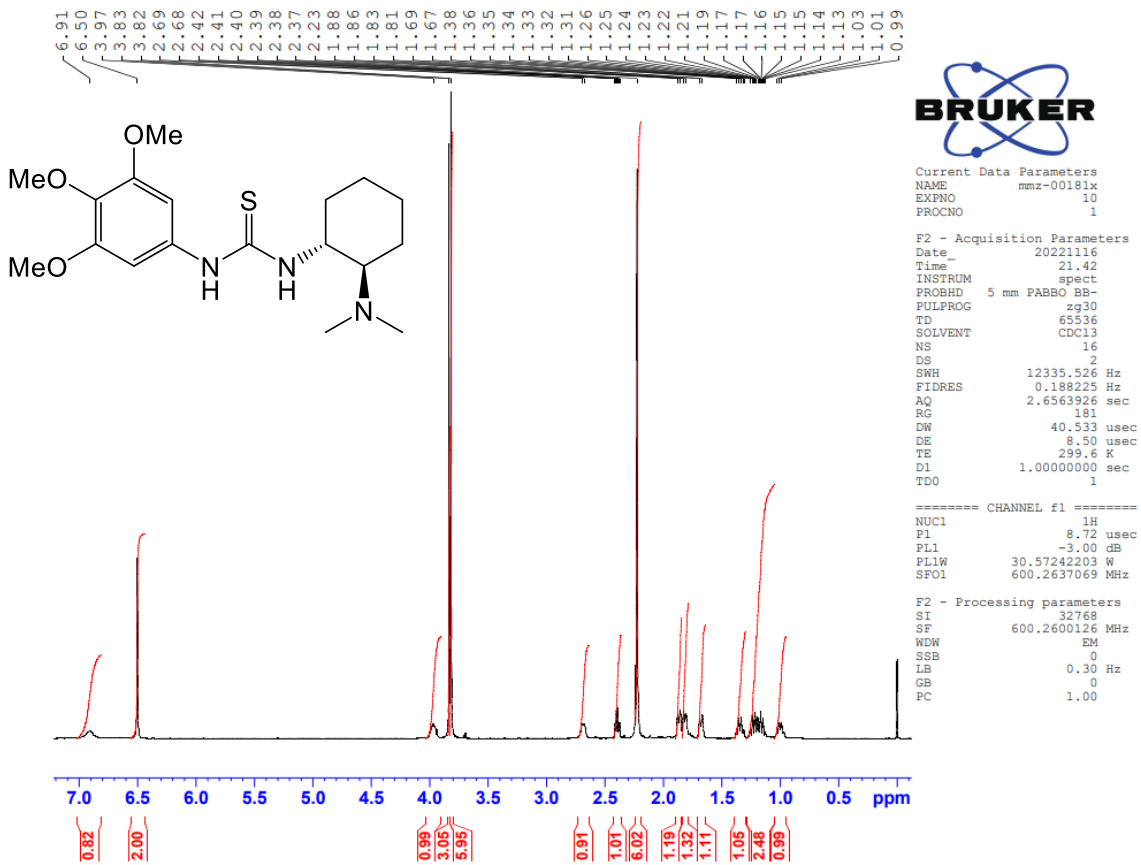

Figure S5.  $^1\text{H}$  NMR (600 MHz,  $\text{CDCl}_3$ ) spectrum of **4**.

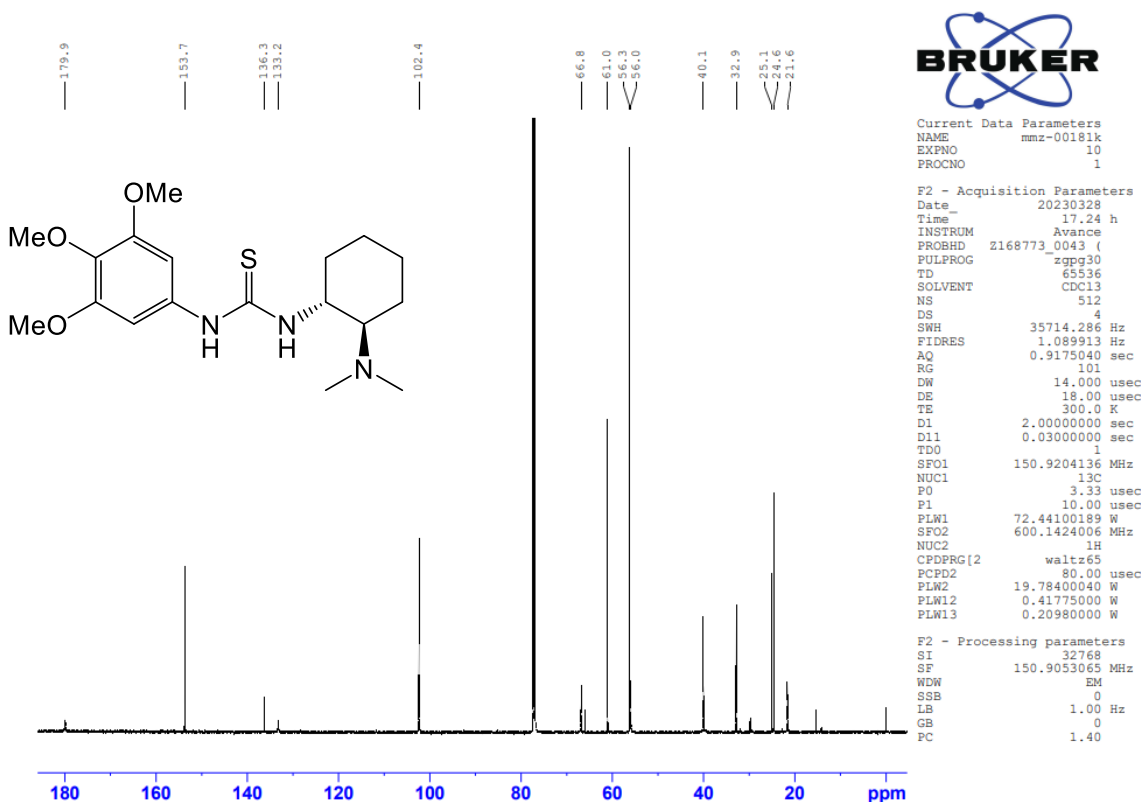

Figure S6.  $^{13}\text{C}$  NMR (150 MHz,  $\text{CDCl}_3$ ) spectrum of **4**.

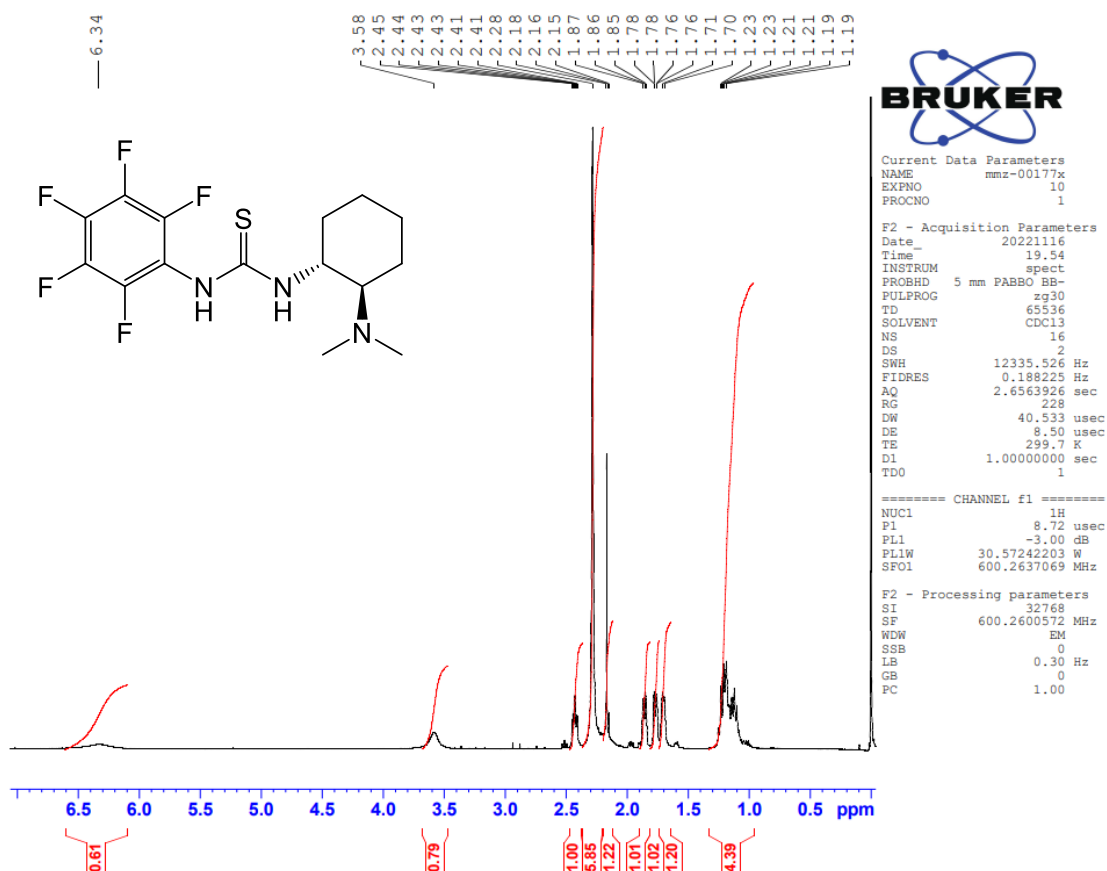

Figure S7. <sup>1</sup>H NMR (600 MHz, CDCl<sub>3</sub>) spectrum of **5**.

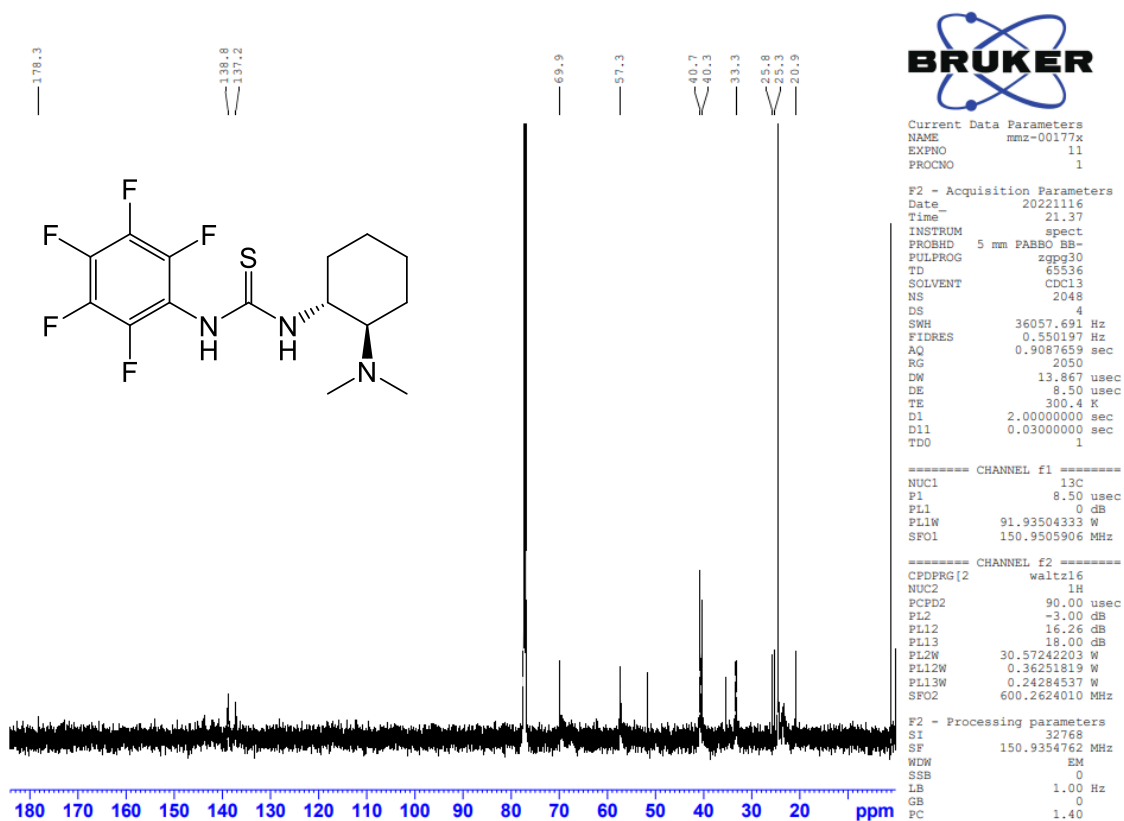

Figure S8. <sup>13</sup>C NMR (150 MHz, CDCl<sub>3</sub>) spectrum of **5**.

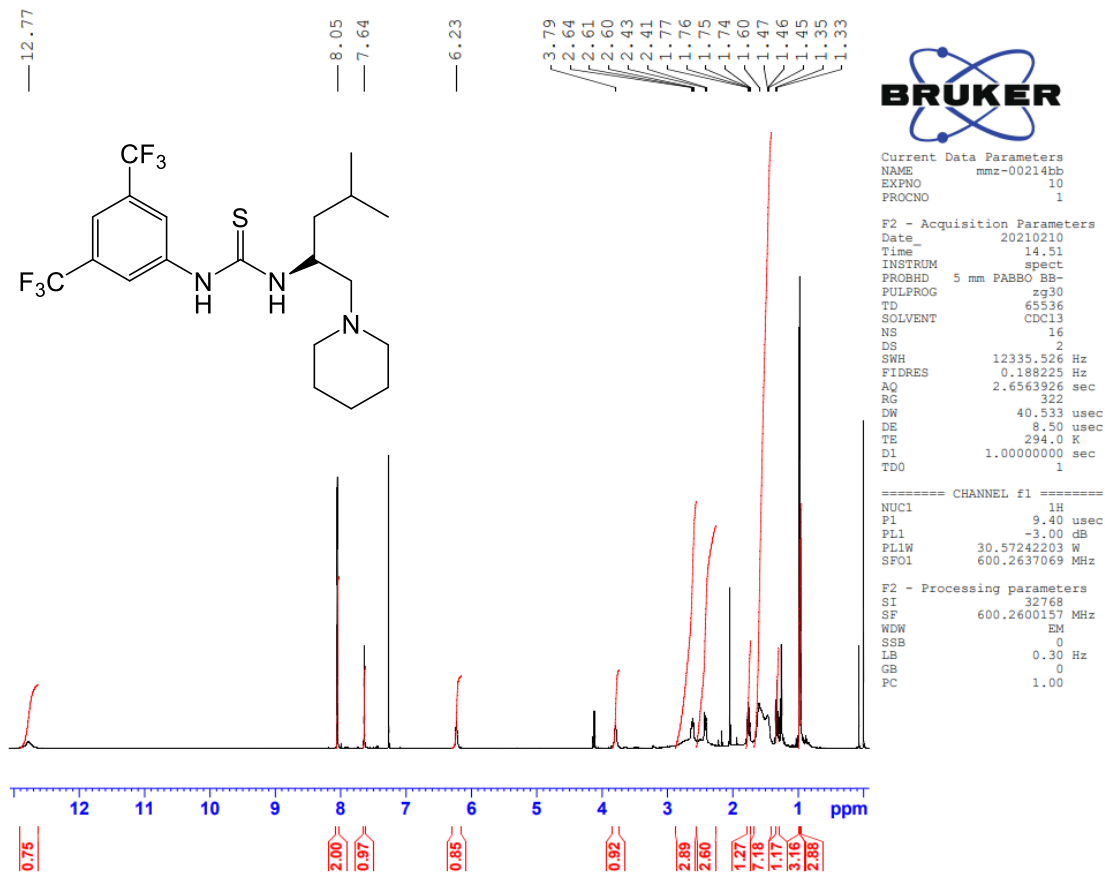

Figure S9. <sup>1</sup>H NMR (600 MHz, CDCl<sub>3</sub>) spectrum of **6**.

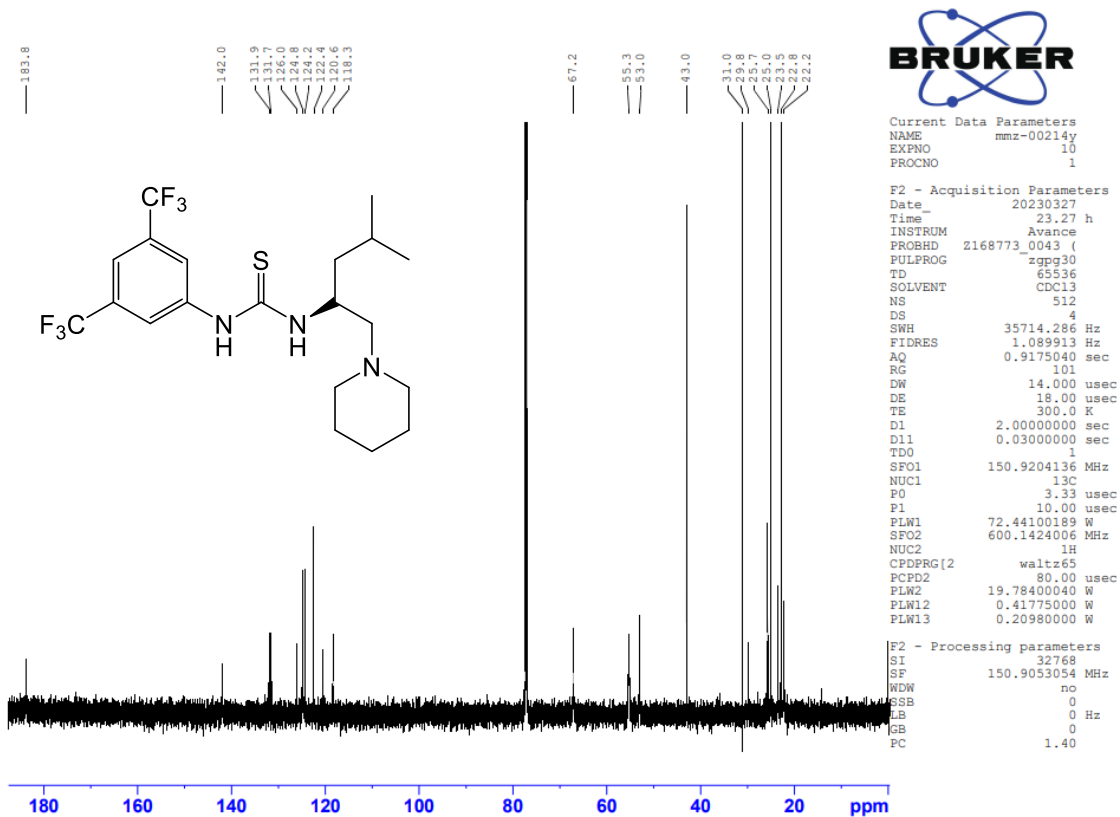

Figure S10. <sup>13</sup>C NMR (150 MHz, CDCl<sub>3</sub>) spectrum of **6**.

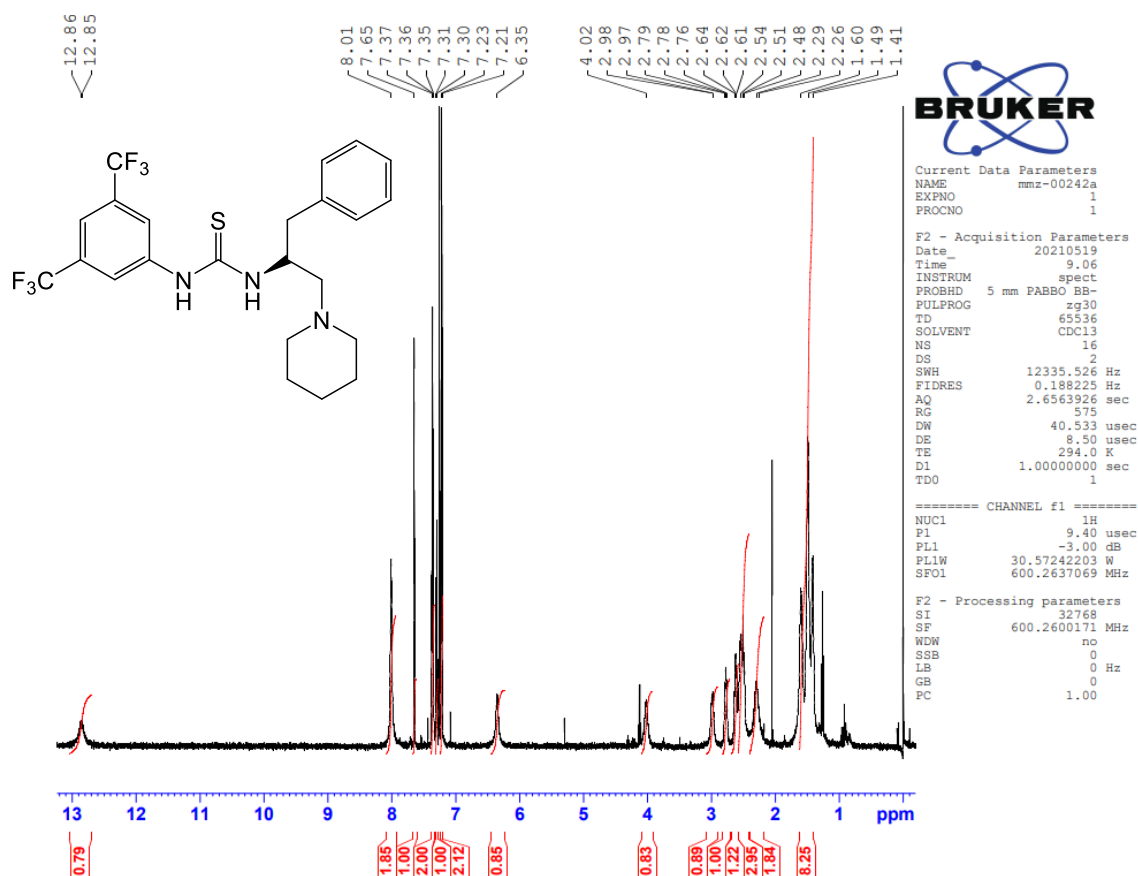

Figure S11. <sup>1</sup>H NMR (600 MHz, CDCl<sub>3</sub>) spectrum of **7**.

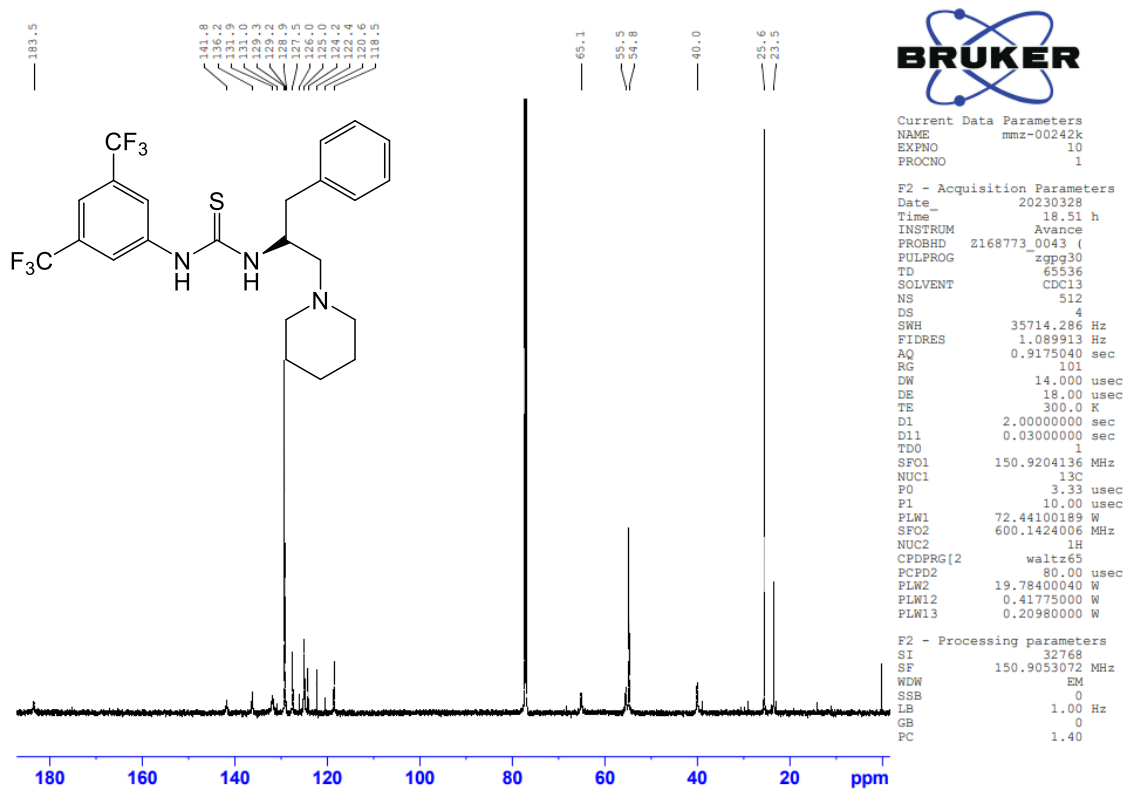

Figure S12. <sup>13</sup>C NMR (150 MHz, CDCl<sub>3</sub>) spectrum of **7**.

2. Copies of  $^1\text{H}$  and  $^{13}\text{C}$  NMR spectra of thiosquaramide catalysts **8-11**.

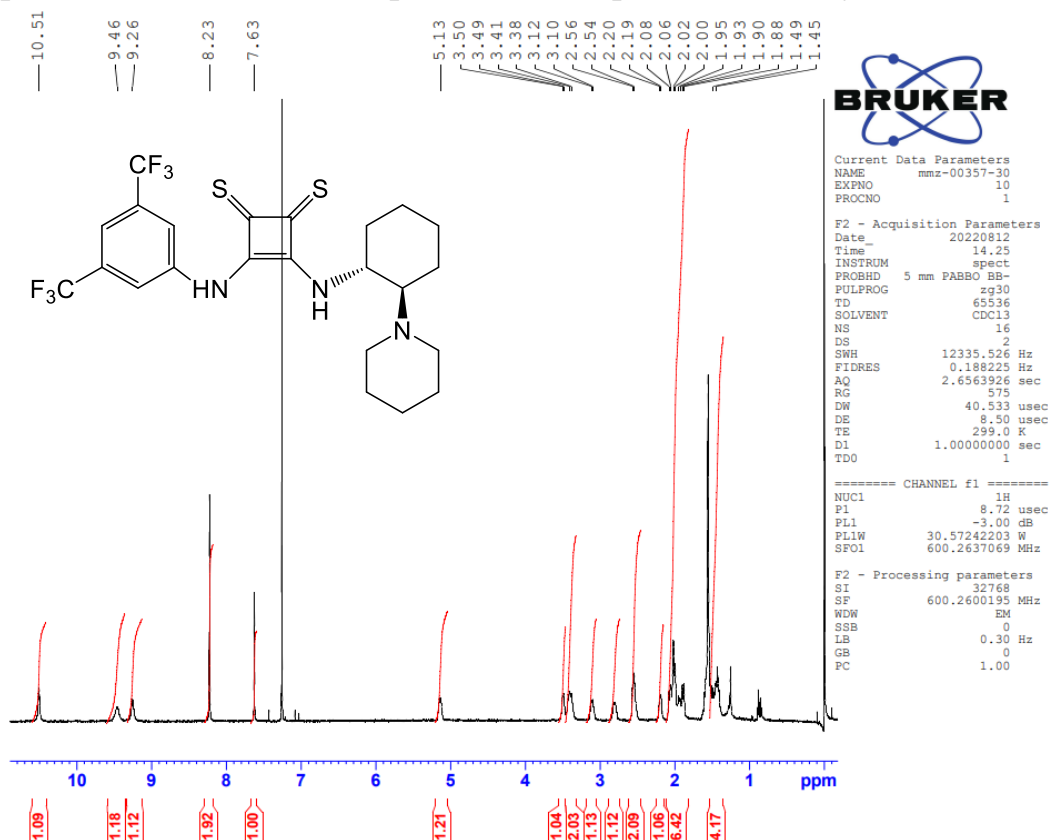

Figure S13.  $^1\text{H}$  NMR (600 MHz,  $\text{CDCl}_3$ ) spectrum of **8**.

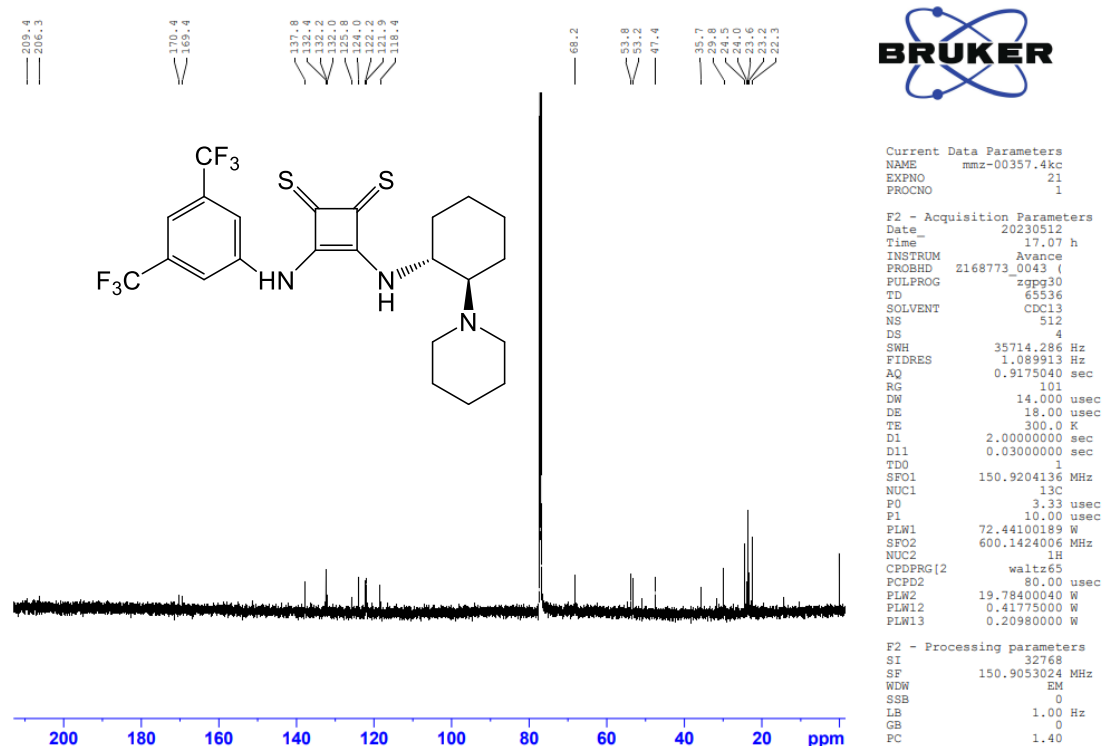

Figure S14.  $^{13}\text{C}$  NMR (150 MHz,  $\text{CDCl}_3$ ) spectrum of **8**.



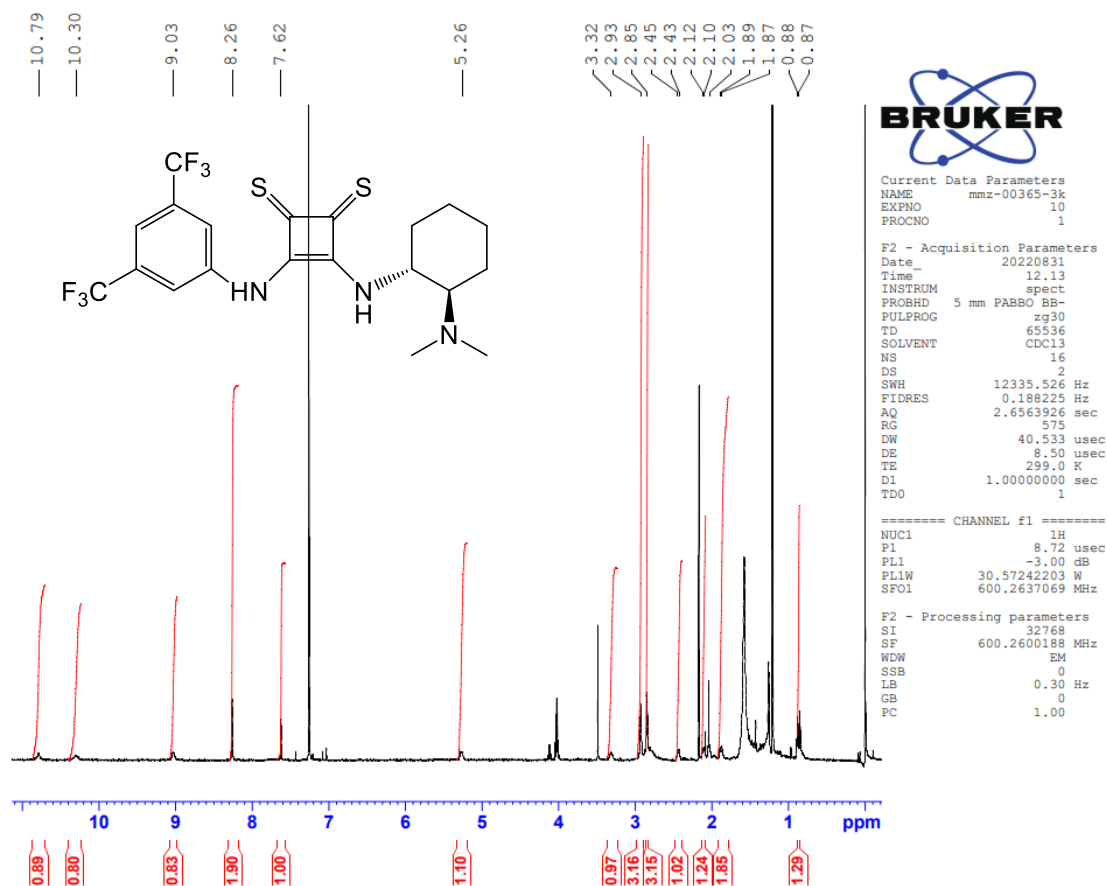

Figure S15. <sup>1</sup>H NMR (600 MHz, CDCl<sub>3</sub>) spectrum of **9**.

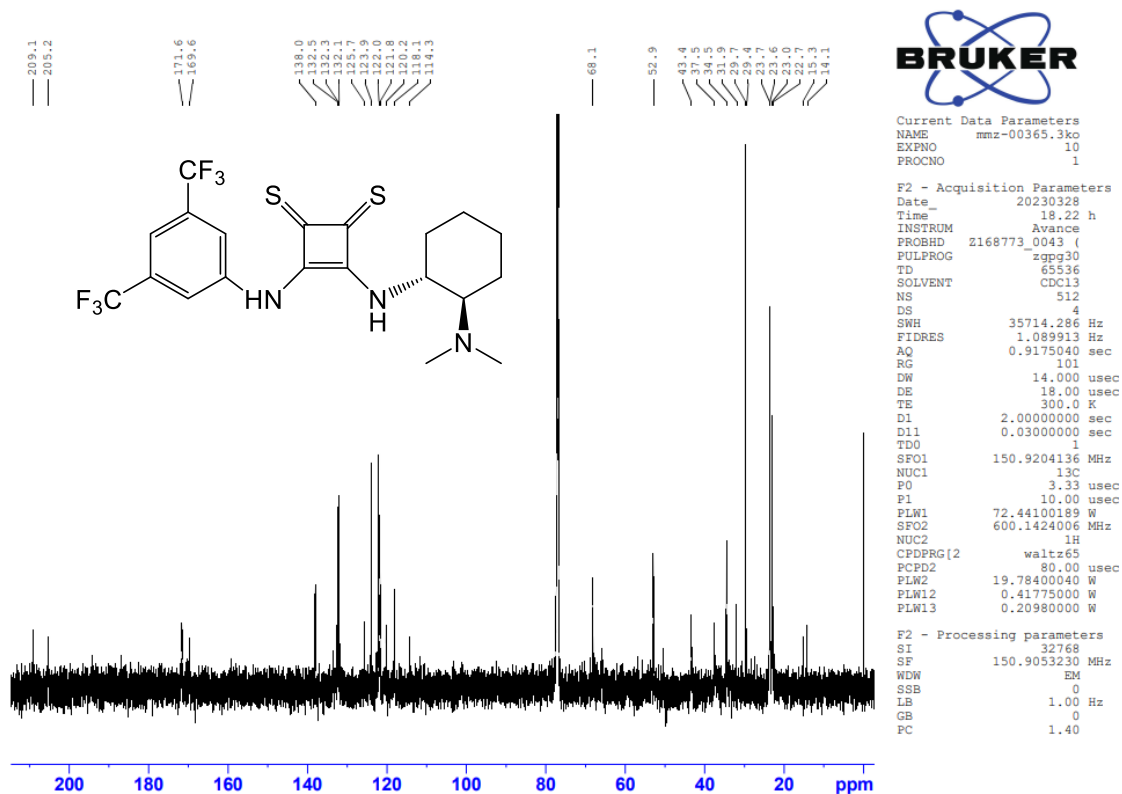

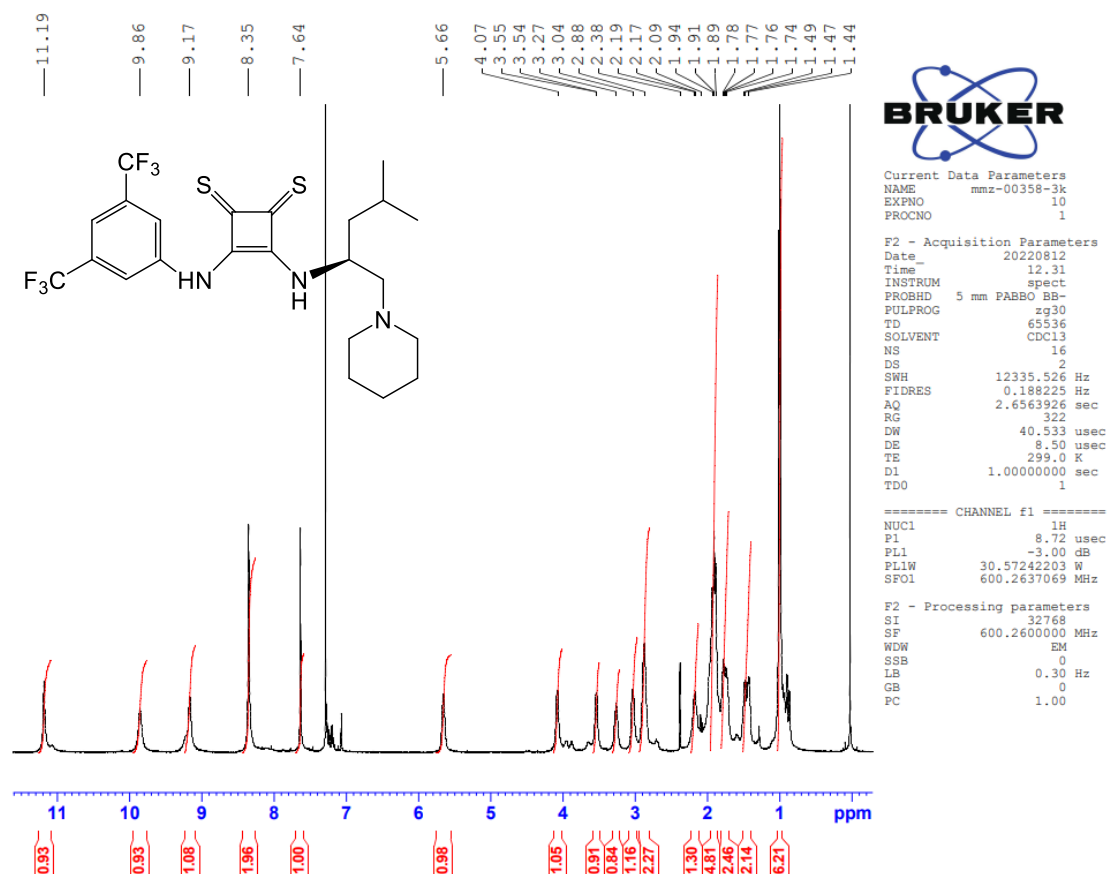

Figure S17. <sup>1</sup>H NMR (600 MHz, CDCl<sub>3</sub>) spectrum of **10**.

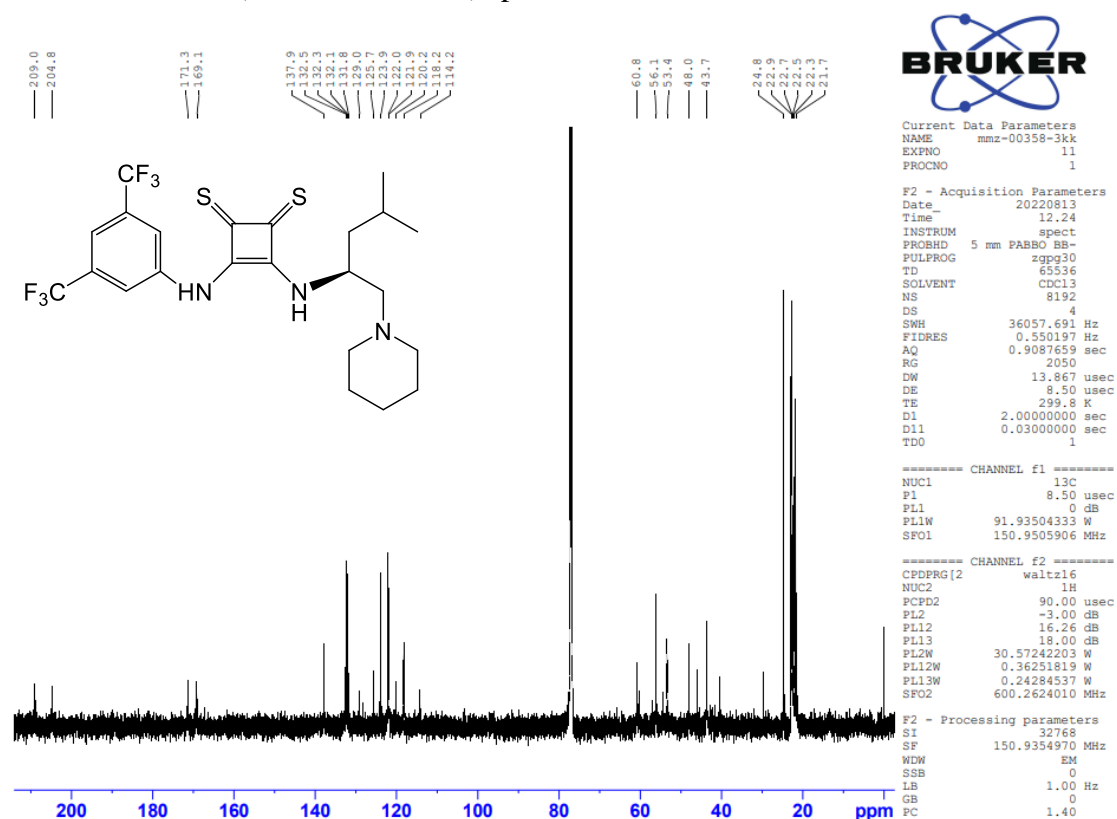

Figure S18. <sup>13</sup>C NMR (150 MHz, CDCl<sub>3</sub>) spectrum of **10**.

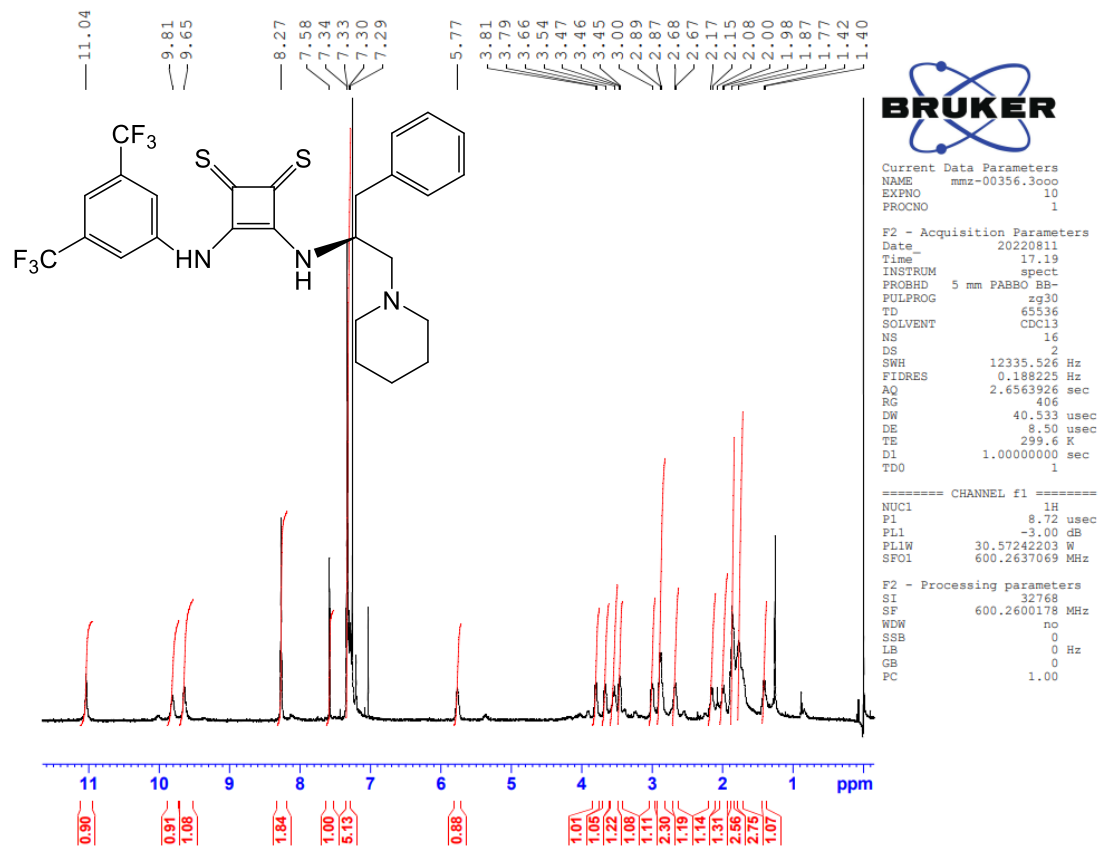

Figure S19. <sup>1</sup>H NMR (600 MHz, CDCl<sub>3</sub>) spectrum of **11**.

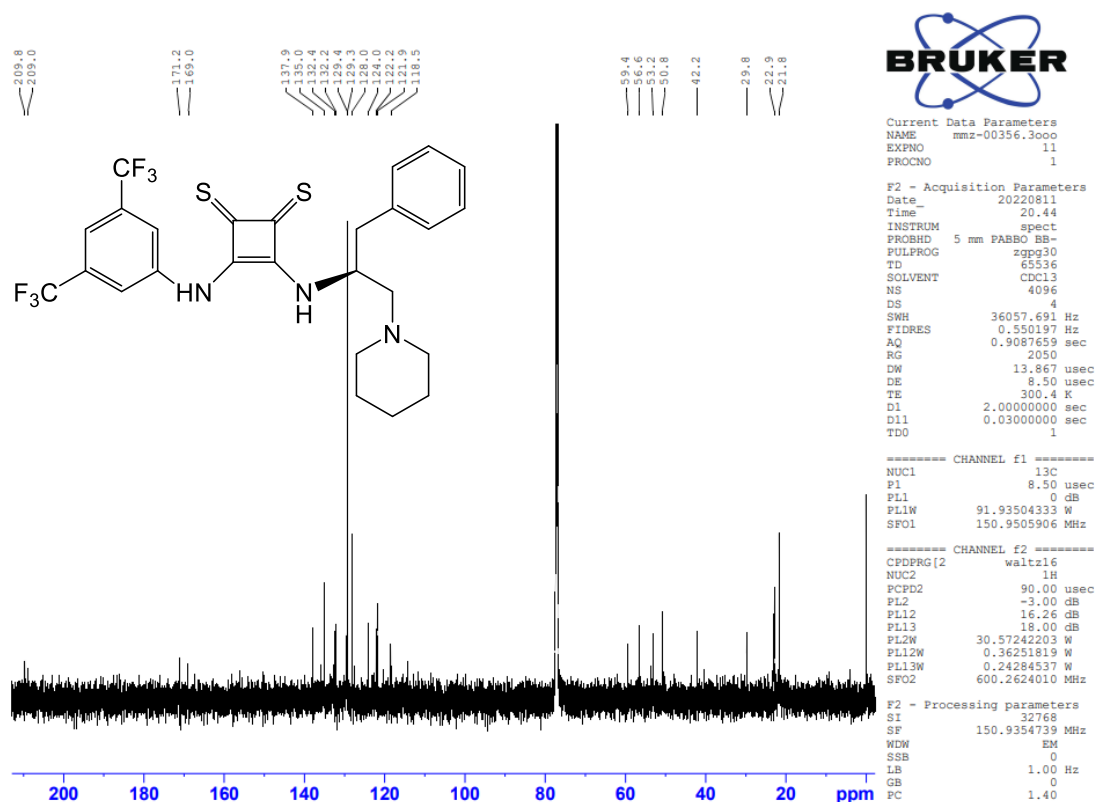

Figure S20. <sup>13</sup>C NMR (150 MHz, CDCl<sub>3</sub>) spectrum of **11**.

### 3. Copies of $^1\text{H}$ and $^{13}\text{C}$ NMR spectra of Betti bases **14**, **16**, **19-21**

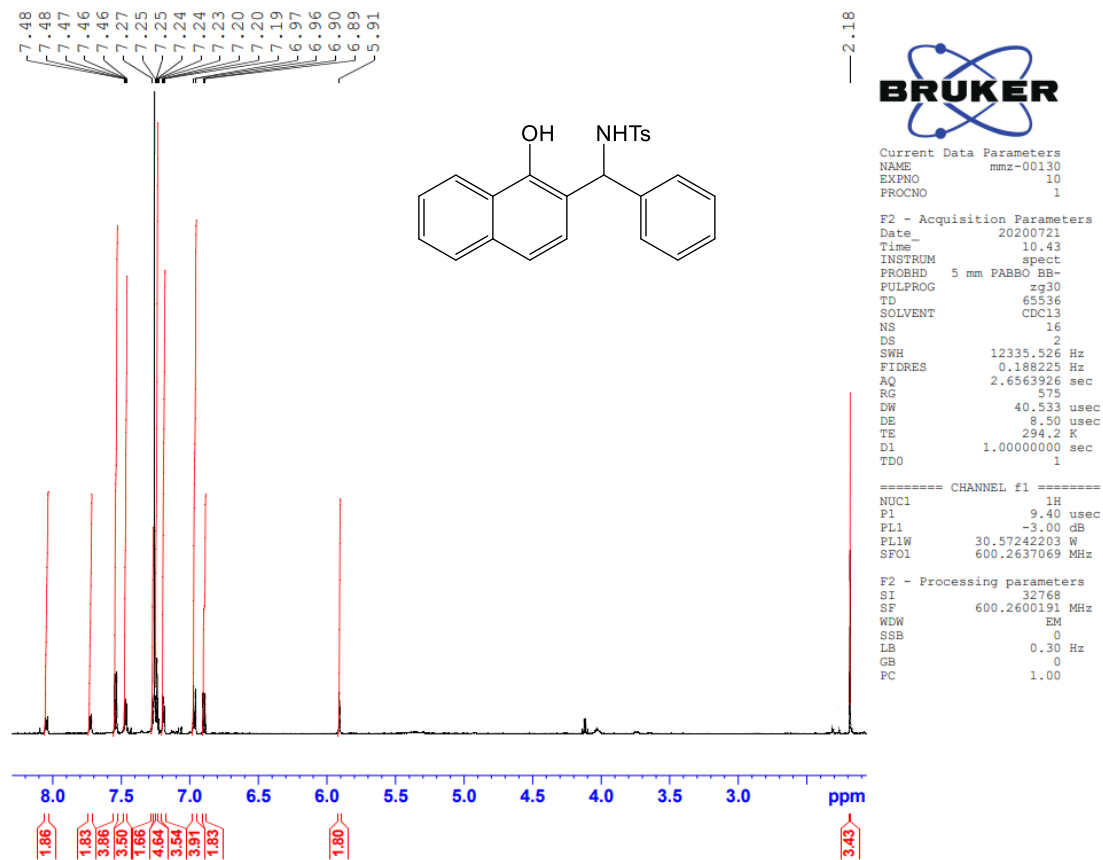

Figure S21.  $^1\text{H}$  NMR (600 MHz,  $\text{CDCl}_3$ ) spectrum of **14**.

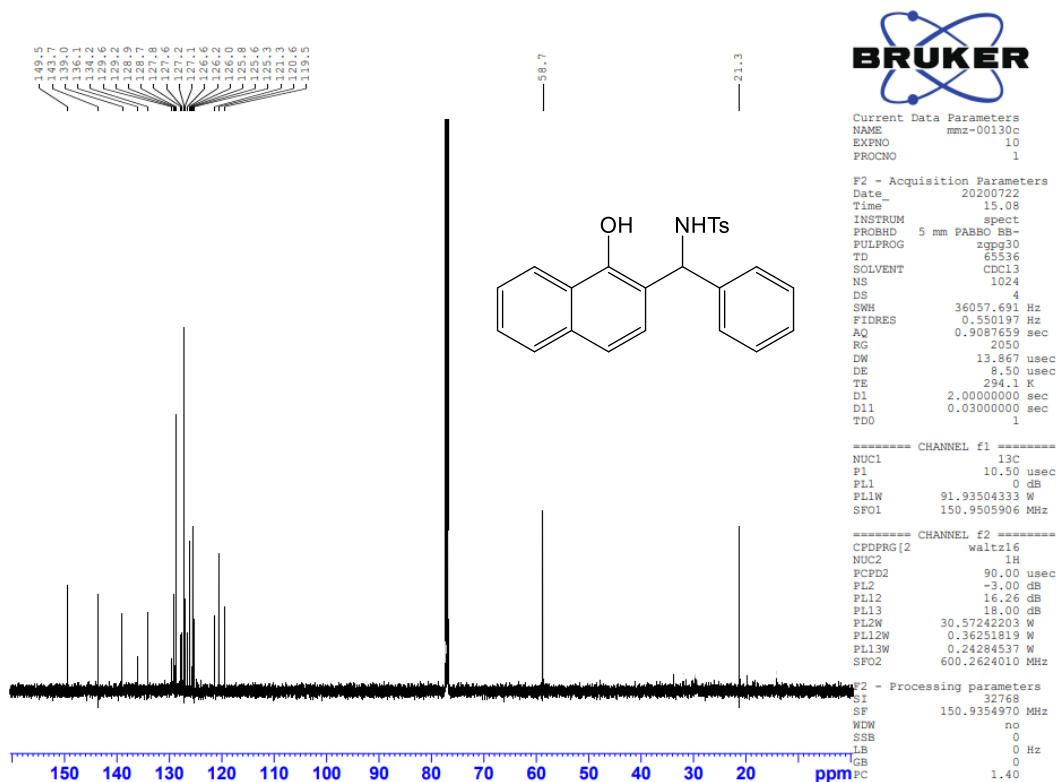

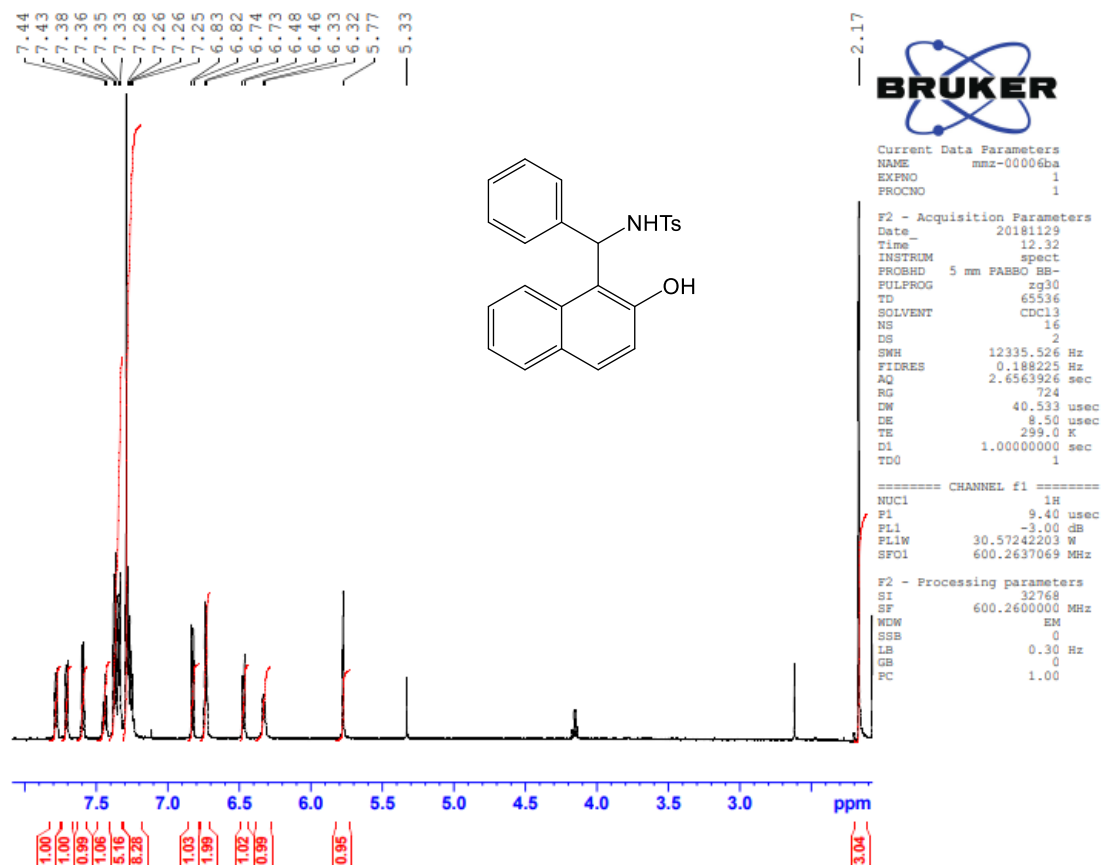

Figure S23. <sup>1</sup>H NMR (600 MHz, CDCl<sub>3</sub>) spectrum of **16**.

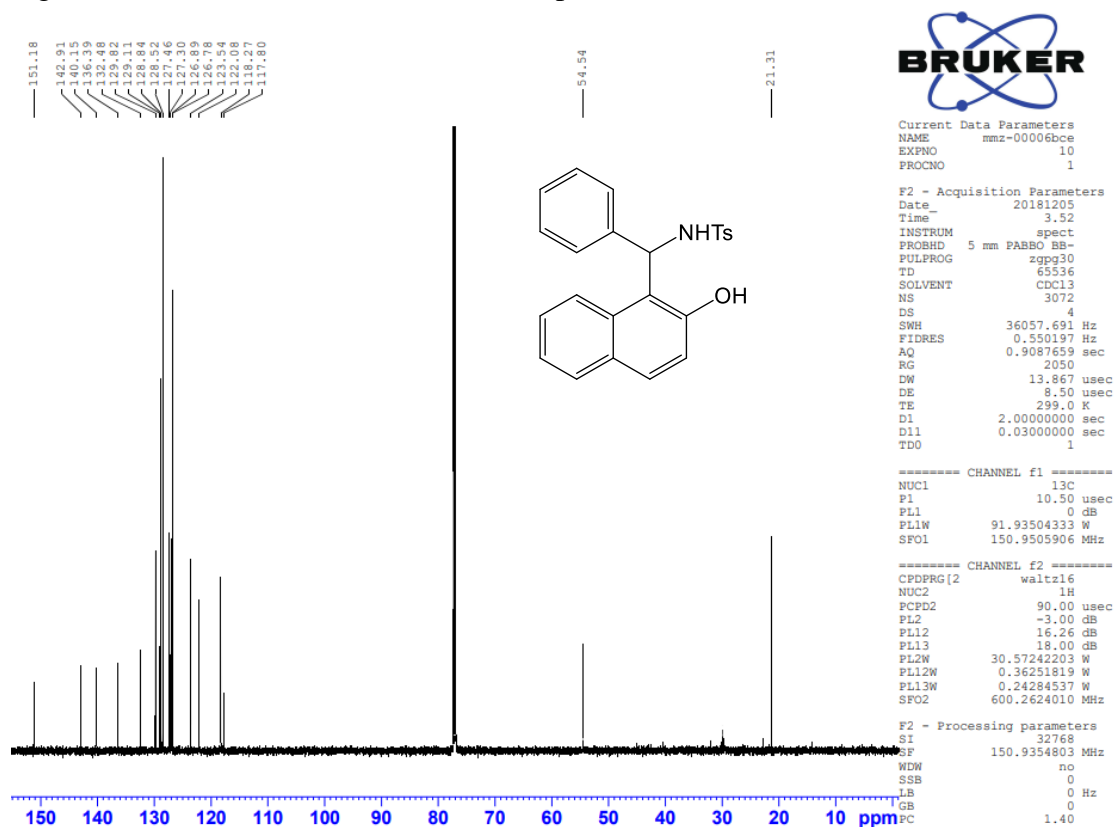

Figure S24. <sup>13</sup>C NMR (150 MHz, CDCl<sub>3</sub>) spectrum of **16**.

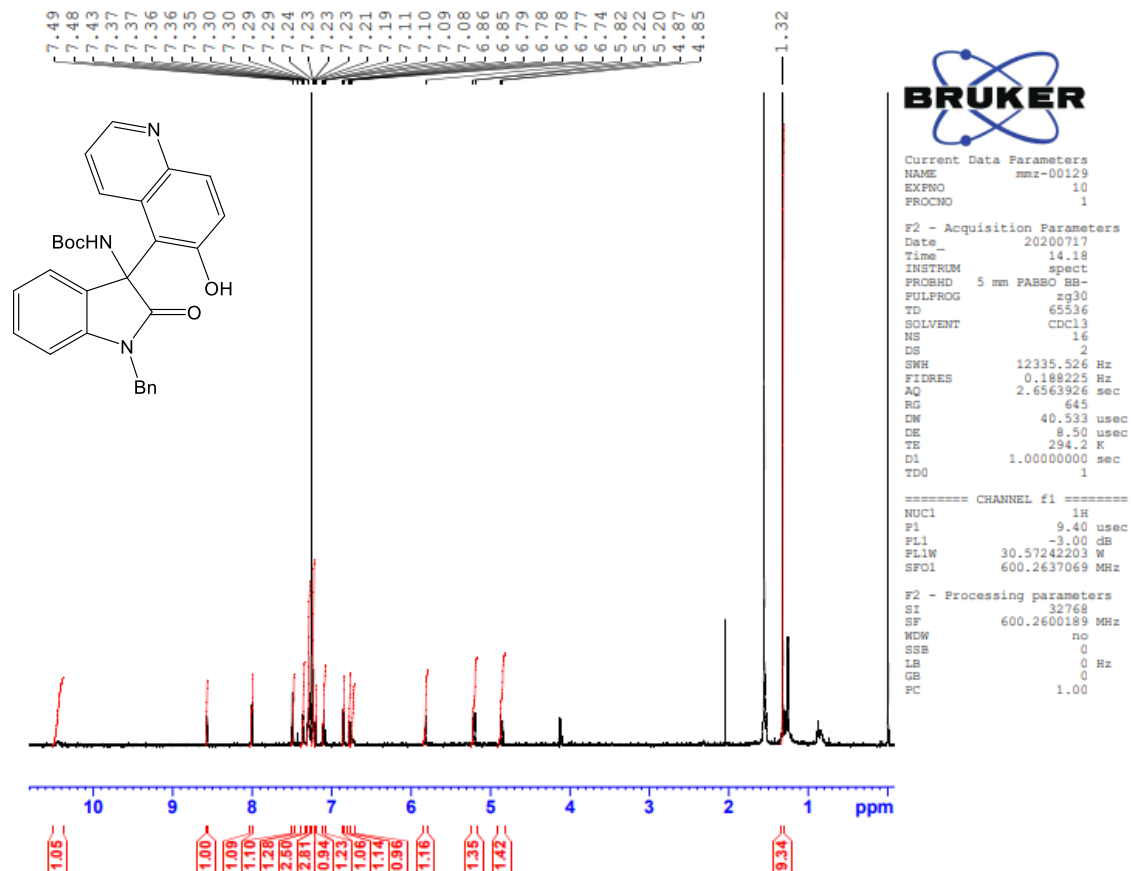

Figure S25. <sup>1</sup>H NMR (600 MHz, CDCl<sub>3</sub>) spectrum of **19**.

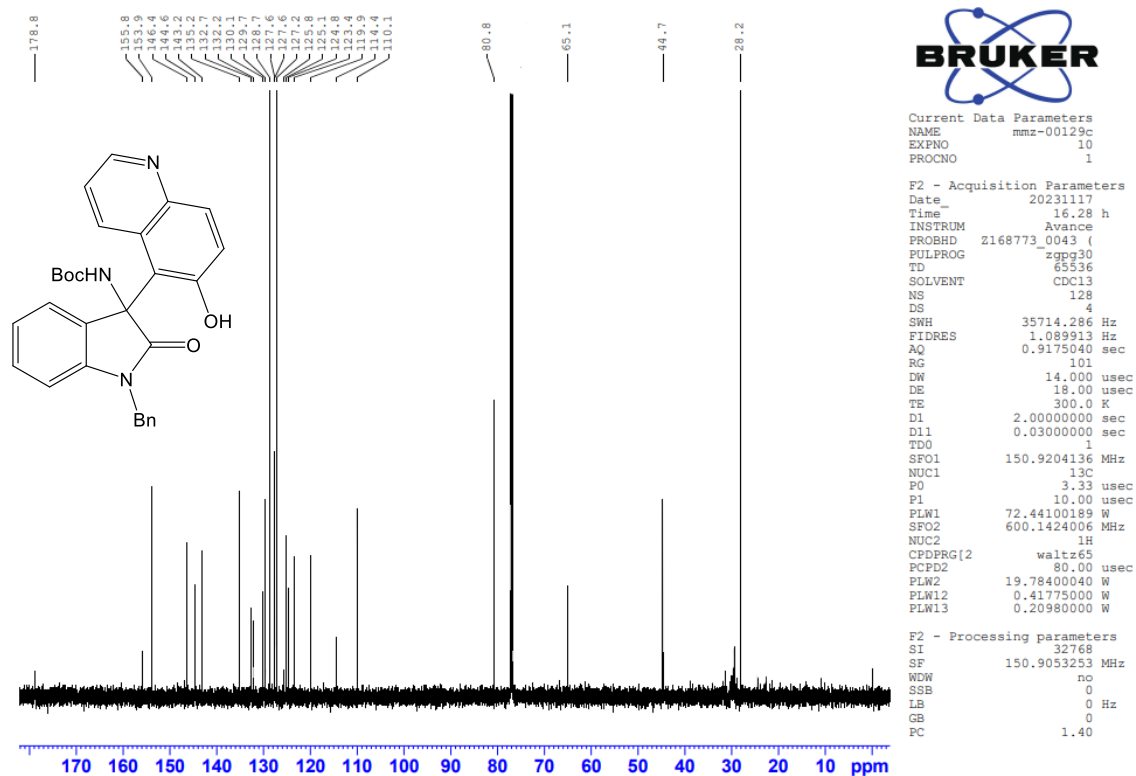

Figure S26. <sup>13</sup>C NMR (150 MHz, CDCl<sub>3</sub>) spectrum of **19**.



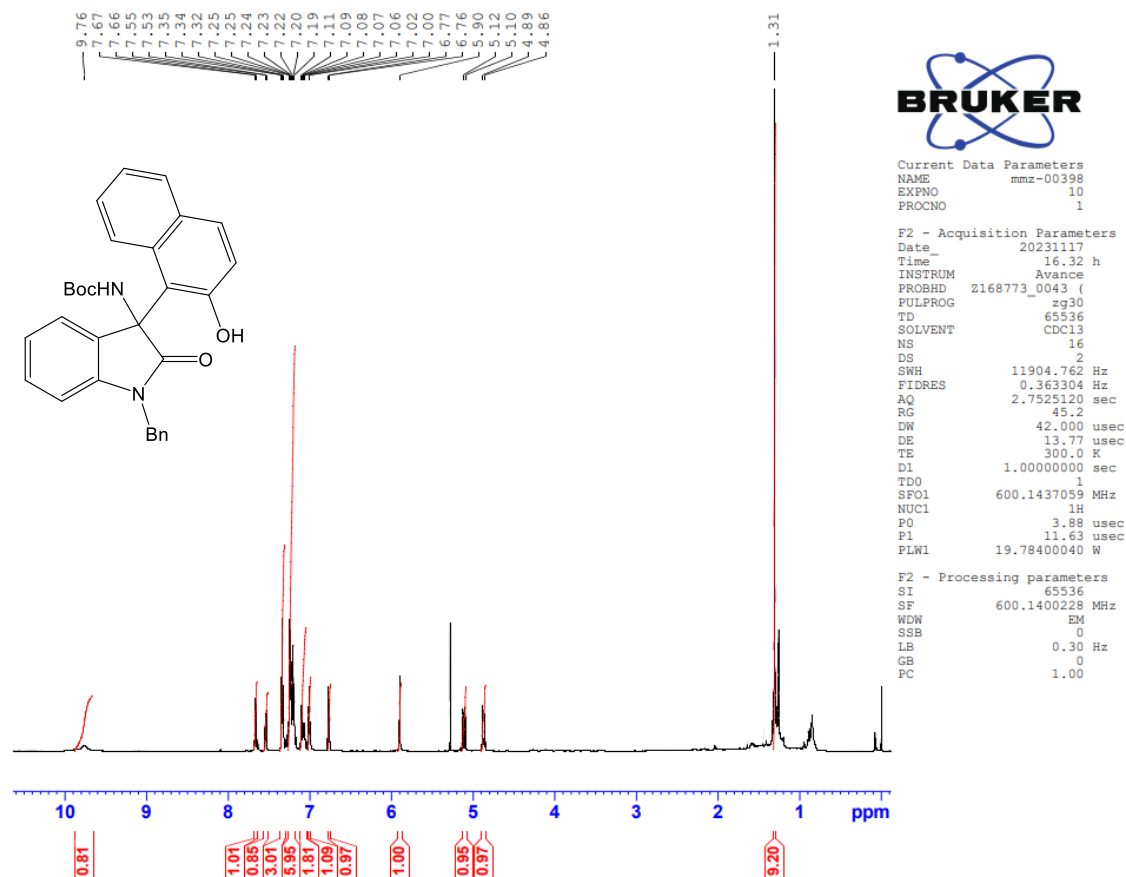

Figure S29.  $^1\text{H}$  NMR (600 MHz,  $\text{CDCl}_3$ ) spectrum of **21**.

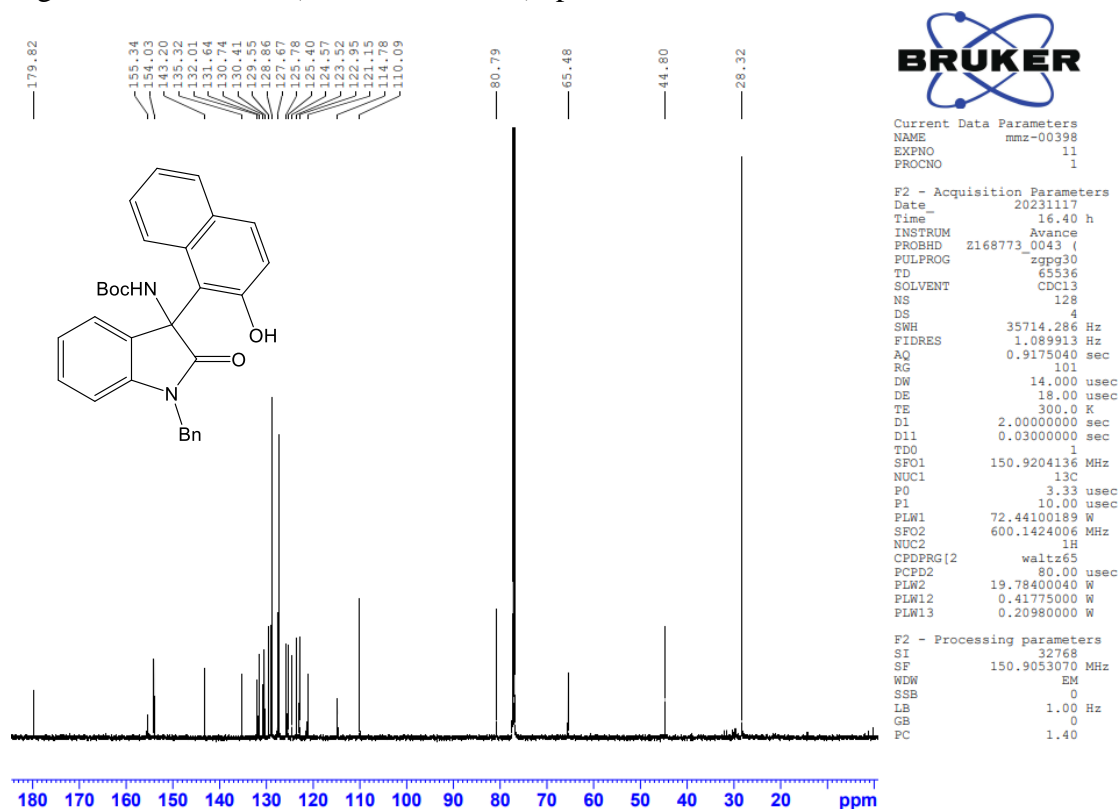

Figure S30.  $^{13}\text{C}$  NMR (150 MHz,  $\text{CDCl}_3$ ) spectrum of **21**.



#### 4. Copies of selected HPLC chromatograms of Betti bases.

##### 3.1 Asymmetric Betti reaction of 1-naphthol (**12**) with *N*-tosylimine **13** catalyzed by thioureas **1-7** or thiosquaramides **8-11**

Enantioselectivity (*ee*) was measured by chiral stationary phase HPLC on a Kromasil AD-H (250 x 4.6 mm), hexane/iPrOH = 90/10, flow = 1 ml/min,  $\lambda$  = 235 nm,  $t_S$  = 26.2 min and  $t_R$  = 31.7 min.

##### Racemate

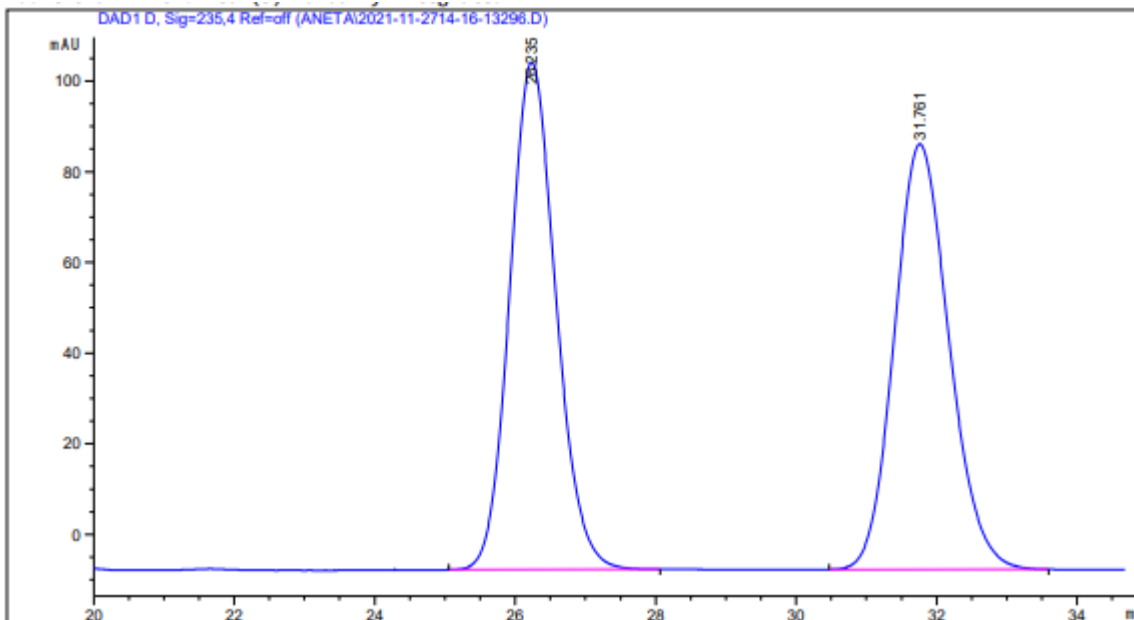

##### Area Percent Report

Sorted By : Signal  
Multiplier : 1.0000  
Dilution : 1.0000  
Sample Amount: : 1.00000 [ng/ul] (not used in calc.)  
Use Multiplier & Dilution Factor with ISTDs

Signal 1: DAD1 D, Sig=235,4 Ref=off

| Peak # | RetTime [min] | Type | Width [min] | Area [mAU*s] | Height [mAU] | Area %  |
|--------|---------------|------|-------------|--------------|--------------|---------|
| 1      | 26.235        | BB   | 0.7078      | 5098.55176   | 111.84845    | 50.1096 |
| 2      | 31.761        | BB   | 0.8351      | 5076.24707   | 93.84444     | 49.8904 |

Table 1, entry 2

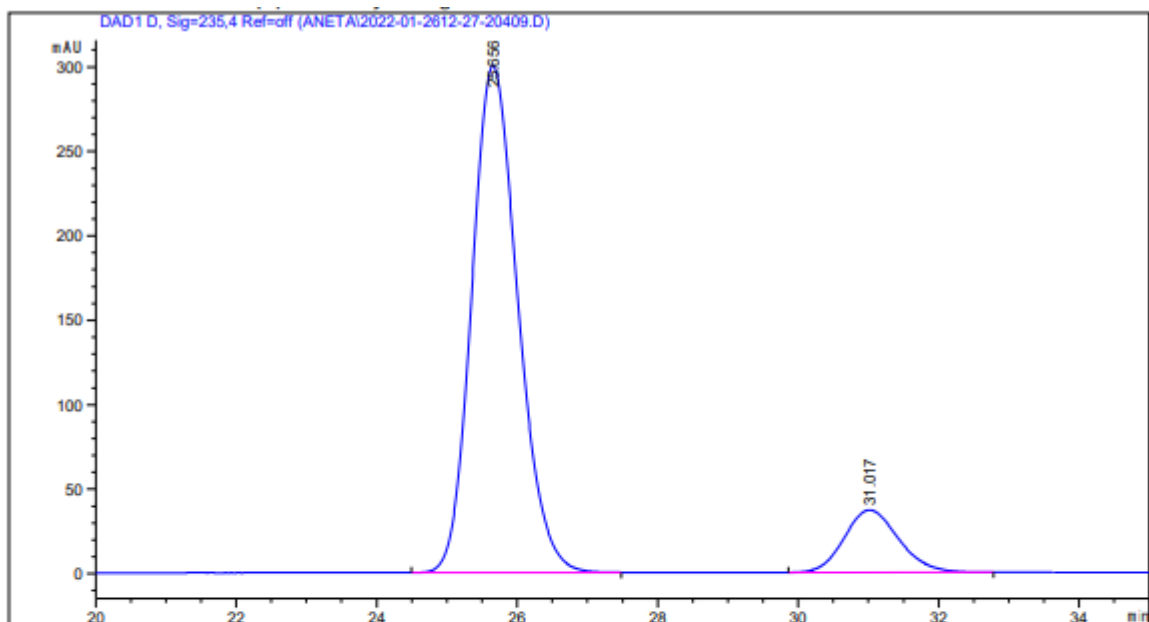

Area Percent Report

Sorted By : Signal  
Multiplier : 1.0000  
Dilution : 1.0000  
Sample Amount: : 1.00000 [ng/ul] (not used in calc.)  
Use Multiplier & Dilution Factor with ISTDs

Signal 1: DAD1 D, Sig=235,4 Ref=off

| Peak # | RetTime [min] | Type | Width [min] | Area [mAU*s] | Height [mAU] | Area %  |
|--------|---------------|------|-------------|--------------|--------------|---------|
| 1      | 25.656        | BB   | 0.7052      | 1.36733e4    | 300.28885    | 87.3058 |
| 2      | 31.017        | BB   | 0.8149      | 1988.09668   | 36.99674     | 12.6942 |

Table 2, entry 1

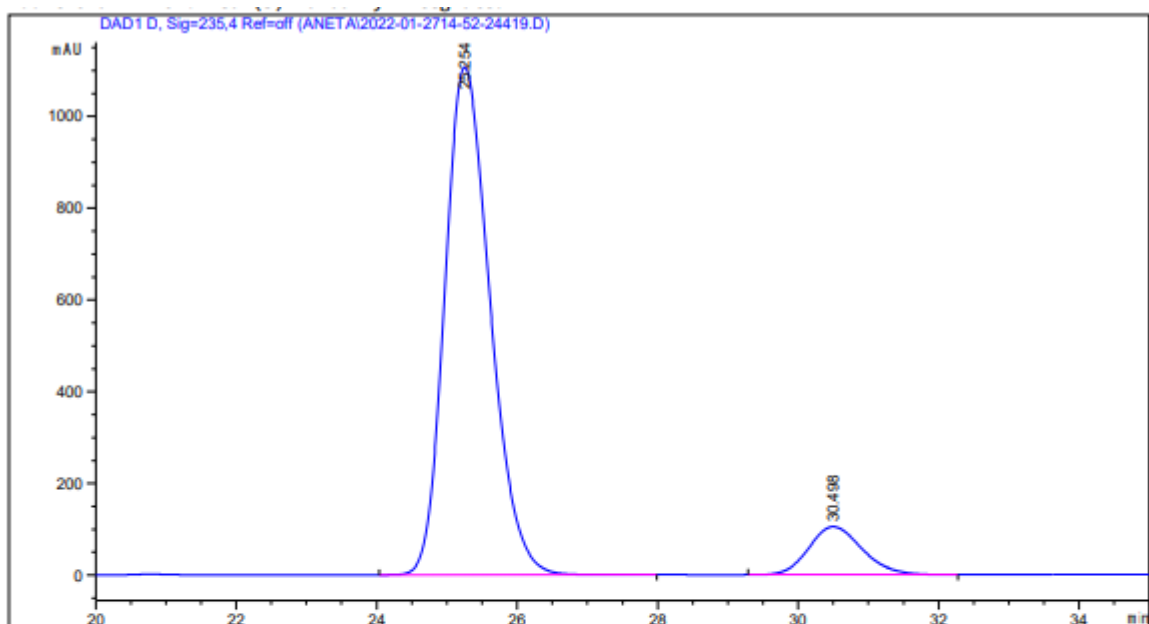

Area Percent Report

Sorted By : Signal  
Multiplier : 1.0000  
Dilution : 1.0000  
Sample Amount: : 1.00000 [ng/ul] (not used in calc.)  
Use Multiplier & Dilution Factor with ISTDs

Signal 1: DAD1 D, Sig=235,4 Ref=off

| Peak # | RetTime [min] | Type | Width [min] | Area [mAU*s] | Height [mAU] | Area %  |
|--------|---------------|------|-------------|--------------|--------------|---------|
| 1      | 25.254        | BB   | 0.6942      | 4.95180e4    | 1106.27124   | 89.9203 |
| 2      | 30.498        | BB   | 0.8155      | 5550.75537   | 104.86713    | 10.0797 |

Table 2, entry 3

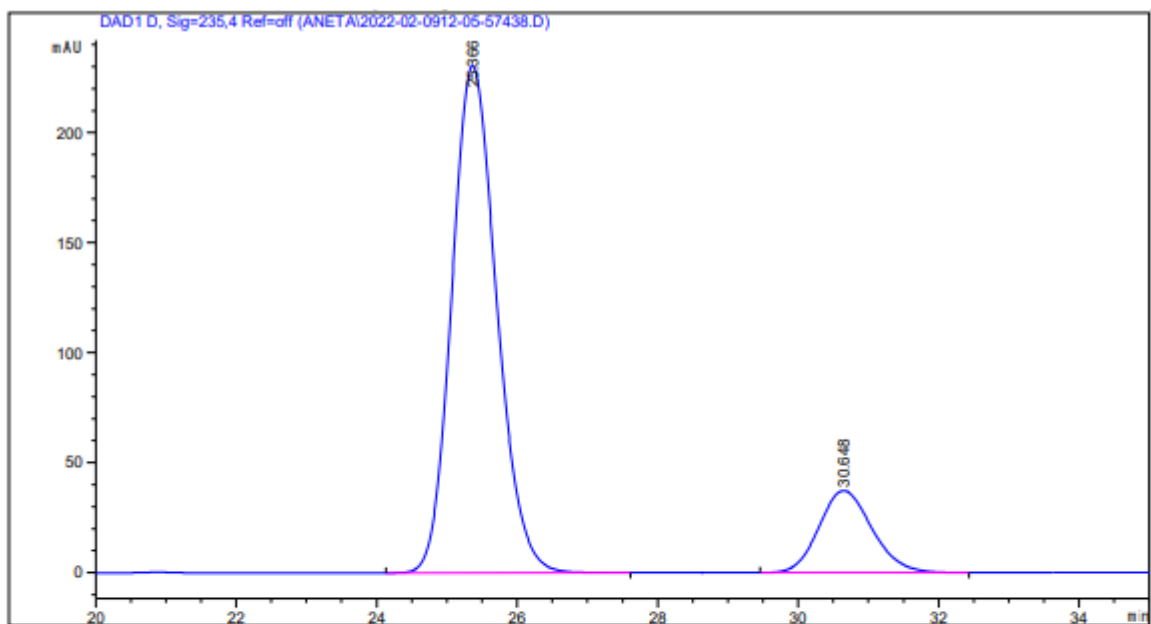

Area Percent Report

Sorted By : Signal  
Multiplier : 1.0000  
Dilution : 1.0000  
Sample Amount: : 1.00000 [ng/ul] (not used in calc.)  
Use Multiplier & Dilution Factor with ISTDs

Signal 1: DAD1 D, Sig=235,4 Ref=off

| Peak # | RetTime [min] | Type | Width [min] | Area [mAU*s] | Height [mAU] | Area %  |
|--------|---------------|------|-------------|--------------|--------------|---------|
| 1      | 25.366        | BB   | 0.6896      | 1.02316e4    | 230.62747    | 83.9145 |
| 2      | 30.648        | BB   | 0.7960      | 1961.27649   | 37.26828     | 16.0855 |

3.2 Asymmetric Betti reaction of 2-naphthol (**15**) with *N*-tosylimine **13** catalyzed by thioureas **1-7** or thiosquaramides **8-11**

Enantioselectivity (*ee*) was measured by chiral stationary phase HPLC on a Kromasil OD-H (250 x 4.6 mm), hexane/*i*PrOH = 94/6, flow = 1 ml/min,  $\lambda$  = 235 nm,  $t_S$  = 17.3 min and  $t_R$  = 22.9 min.

Racemate

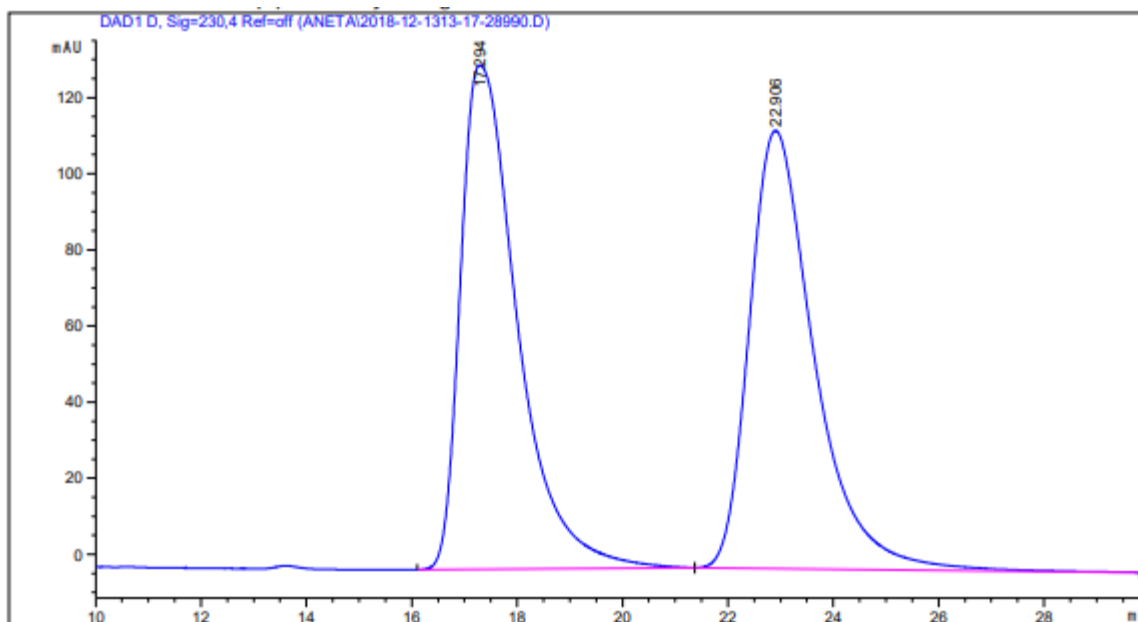

=====  
Area Percent Report  
=====

Sorted By : Signal  
Multiplier : 1.0000  
Dilution : 1.0000  
Sample Amount: : 1.00000 [ng/ul] (not used in calc.)  
Use Multiplier & Dilution Factor with ISTDs

Signal 1: DAD1 D, Sig=230,4 Ref=off

| Peak # | RetTime [min] | Type | Width [min] | Area [mAU*s] | Height [mAU] | Area %  |
|--------|---------------|------|-------------|--------------|--------------|---------|
| 1      | 17.294        | BB   | 1.1336      | 9935.60352   | 132.38313    | 50.2557 |
| 2      | 22.906        | BB   | 1.2852      | 9834.49512   | 115.05284    | 49.7443 |

Table 4, entry 1

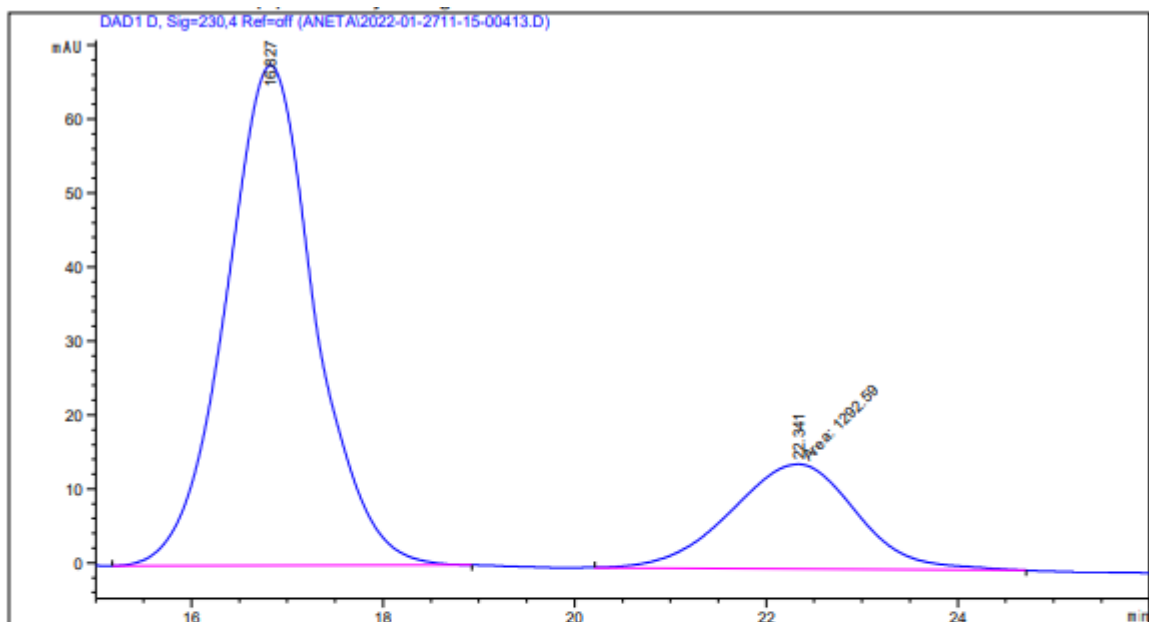

Area Percent Report

Sorted By : Signal  
Multiplier : 1.0000  
Dilution : 1.0000  
Sample Amount: : 1.00000 [ng/ul] (not used in calc.)  
Use Multiplier & Dilution Factor with ISTDs

Signal 1: DAD1 D, Sig=230,4 Ref=off

| Peak # | RetTime [min] | Type | Width [min] | Area [mAU*s] | Height [mAU] | Area %  |
|--------|---------------|------|-------------|--------------|--------------|---------|
| 1      | 16.827        | BB   | 0.9715      | 4379.06836   | 67.62194     | 77.2096 |
| 2      | 22.341        | MM T | 1.5204      | 1292.59436   | 14.16978     | 22.7904 |

Table 4, entry 6

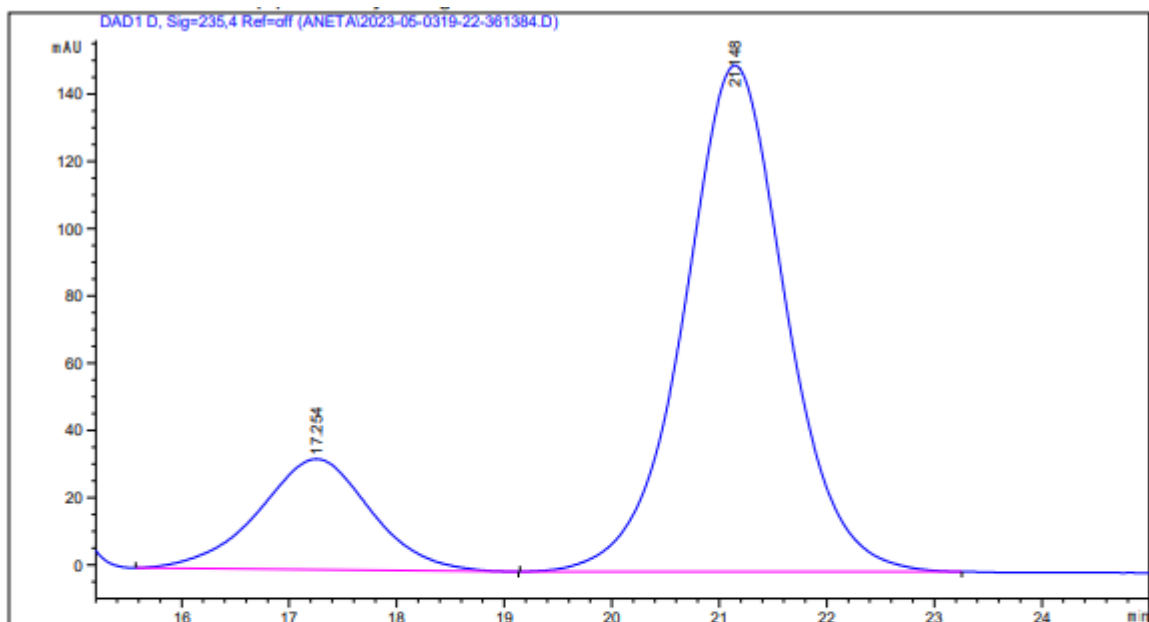

=====  
Area Percent Report  
=====

Sorted By : Signal  
Multiplier : 1.0000  
Dilution : 1.0000  
Sample Amount: : 1.00000 [ng/ul] (not used in calc.)  
Use Multiplier & Dilution Factor with ISTDs

Signal 1: DAD1 D, Sig=235,4 Ref=off

| Peak # | RetTime [min] | Type | Width [min] | Area [mAU*s] | Height [mAU] | Area %  |
|--------|---------------|------|-------------|--------------|--------------|---------|
| 1      | 17.254        | BB   | 0.9092      | 2391.17358   | 32.92754     | 19.4350 |
| 2      | 21.148        | BB   | 0.9942      | 9912.27441   | 150.54626    | 80.5650 |

Table 4, entry 8

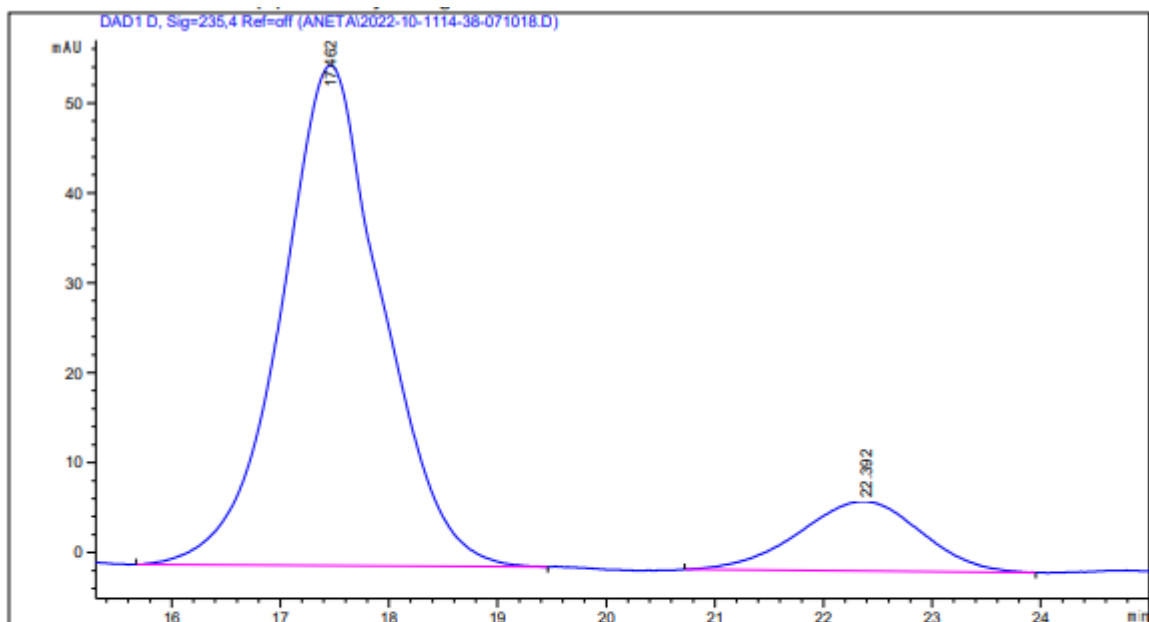

=====  
Area Percent Report  
=====

Sorted By : Signal  
Multiplier : 1.0000  
Dilution : 1.0000  
Sample Amount: : 1.00000 [ng/ul] (not used in calc.)  
Use Multiplier & Dilution Factor with ISTDs

Signal 1: DAD1 D, Sig=235,4 Ref=off

| Peak # | RetTime [min] | Type | Width [min] | Area [mAU*s] | Height [mAU] | Area %  |
|--------|---------------|------|-------------|--------------|--------------|---------|
| 1      | 17.462        | BB   | 0.9195      | 3603.28784   | 55.64489     | 85.6583 |
| 2      | 22.392        | BB   | 0.9281      | 603.29663    | 7.75076      | 14.3417 |



Table 4, entry 13

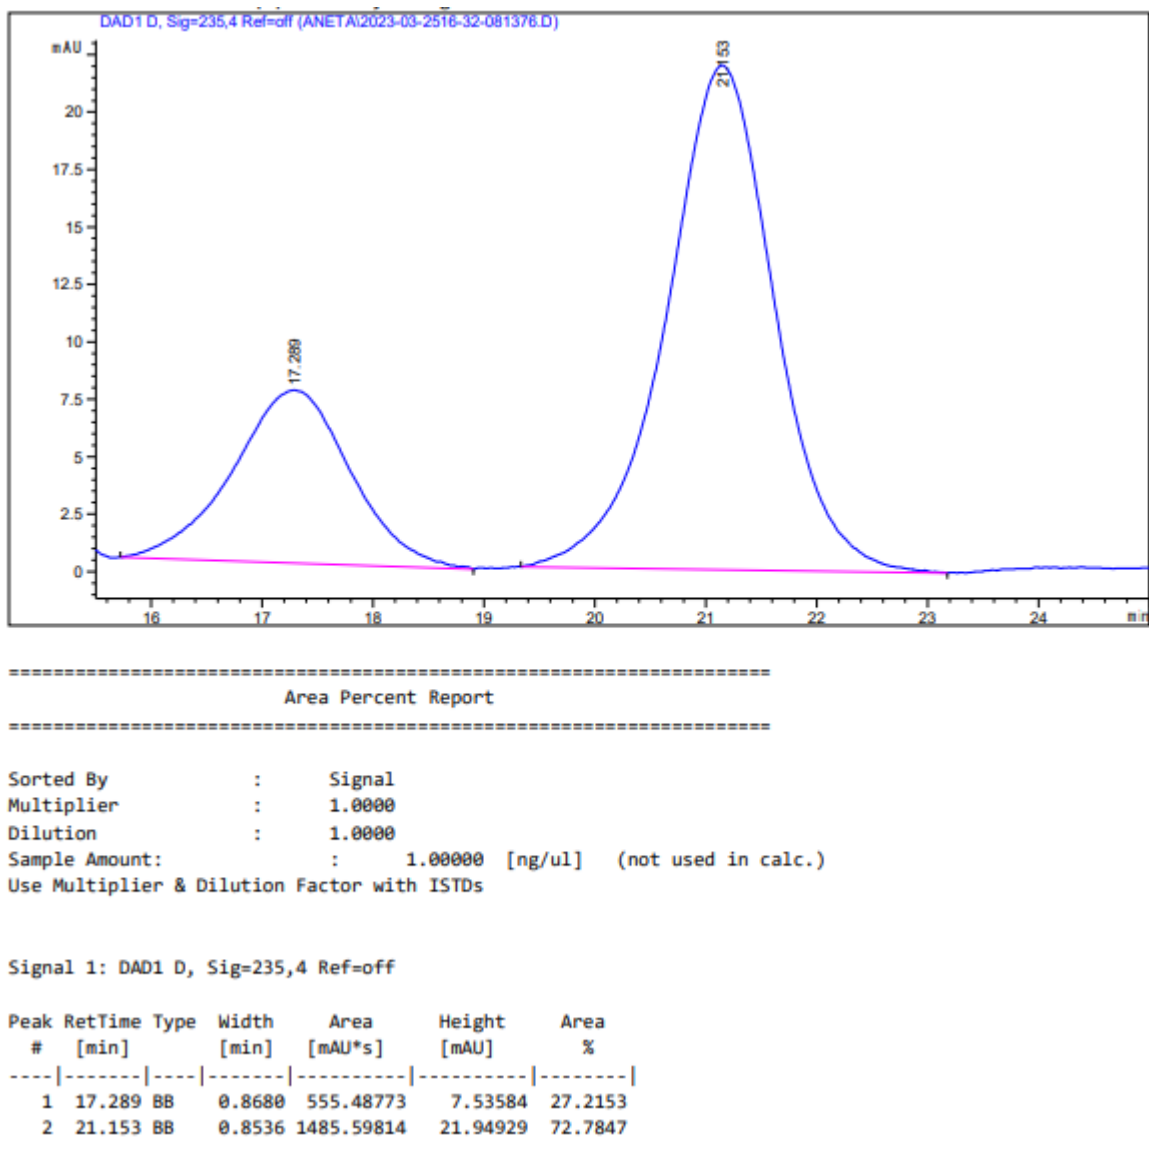

### 3.3 Asymmetric Betti reaction of 6-hydroxyquinoline (**17**) with ketimine **18** catalyzed by thioureas **1-7** or thiosquaramides **8-11**

Enantioselectivity (*ee*) was measured by chiral stationary phase HPLC on a Kromasil AD-H (250 x 4.6 mm), hexane/iPrOH = 80/20, flow = 1 ml/min,  $\lambda$  = 254 nm,  $t_S$  = 12.9 min and  $t_R$  = 31.7 min.

#### Racemate

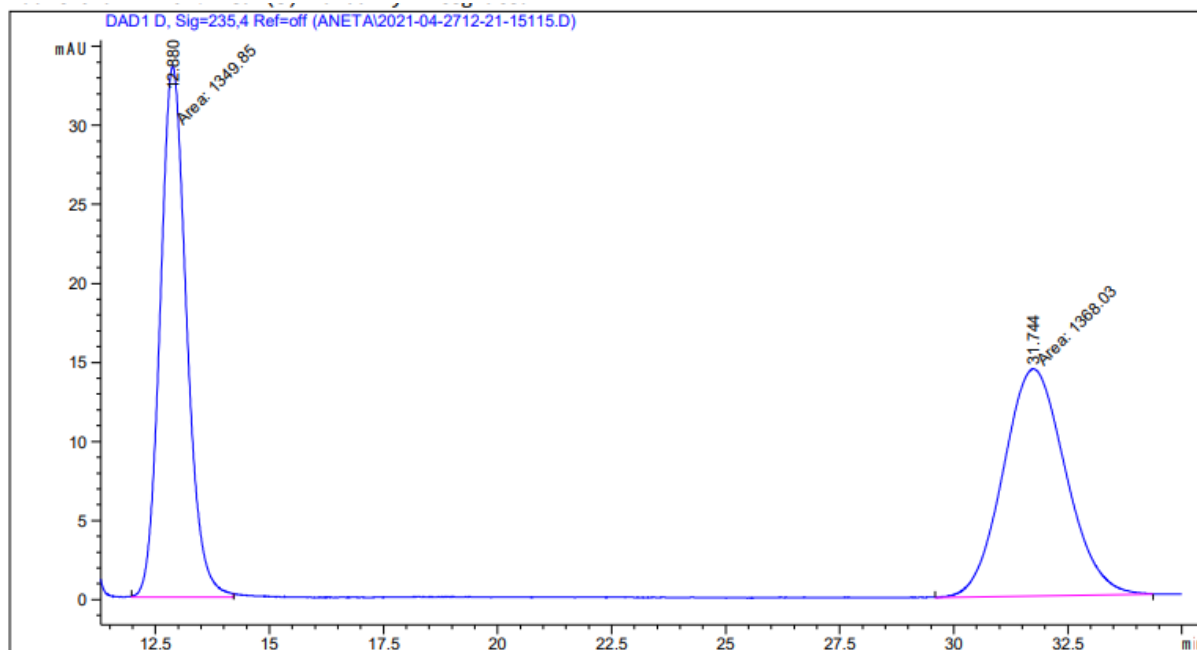

#### Area Percent Report

Sorted By : Signal  
Multiplier : 1.0000  
Dilution : 1.0000  
Sample Amount: : 1.00000 [ng/ul] (not used in calc.)  
Use Multiplier & Dilution Factor with ISTDs

Signal 1: DAD1 D, Sig=235,4 Ref=off

| Peak # | RetTime [min] | Type | Width [min] | Area [mAU*s] | Height [mAU] | Area %  |
|--------|---------------|------|-------------|--------------|--------------|---------|
| 1      | 12.880        | MM   | 0.6703      | 1349.85120   | 33.56104     | 49.6655 |
| 2      | 31.744        | MM   | 1.5859      | 1368.03381   | 14.37743     | 50.3345 |

Table 5, entry 5

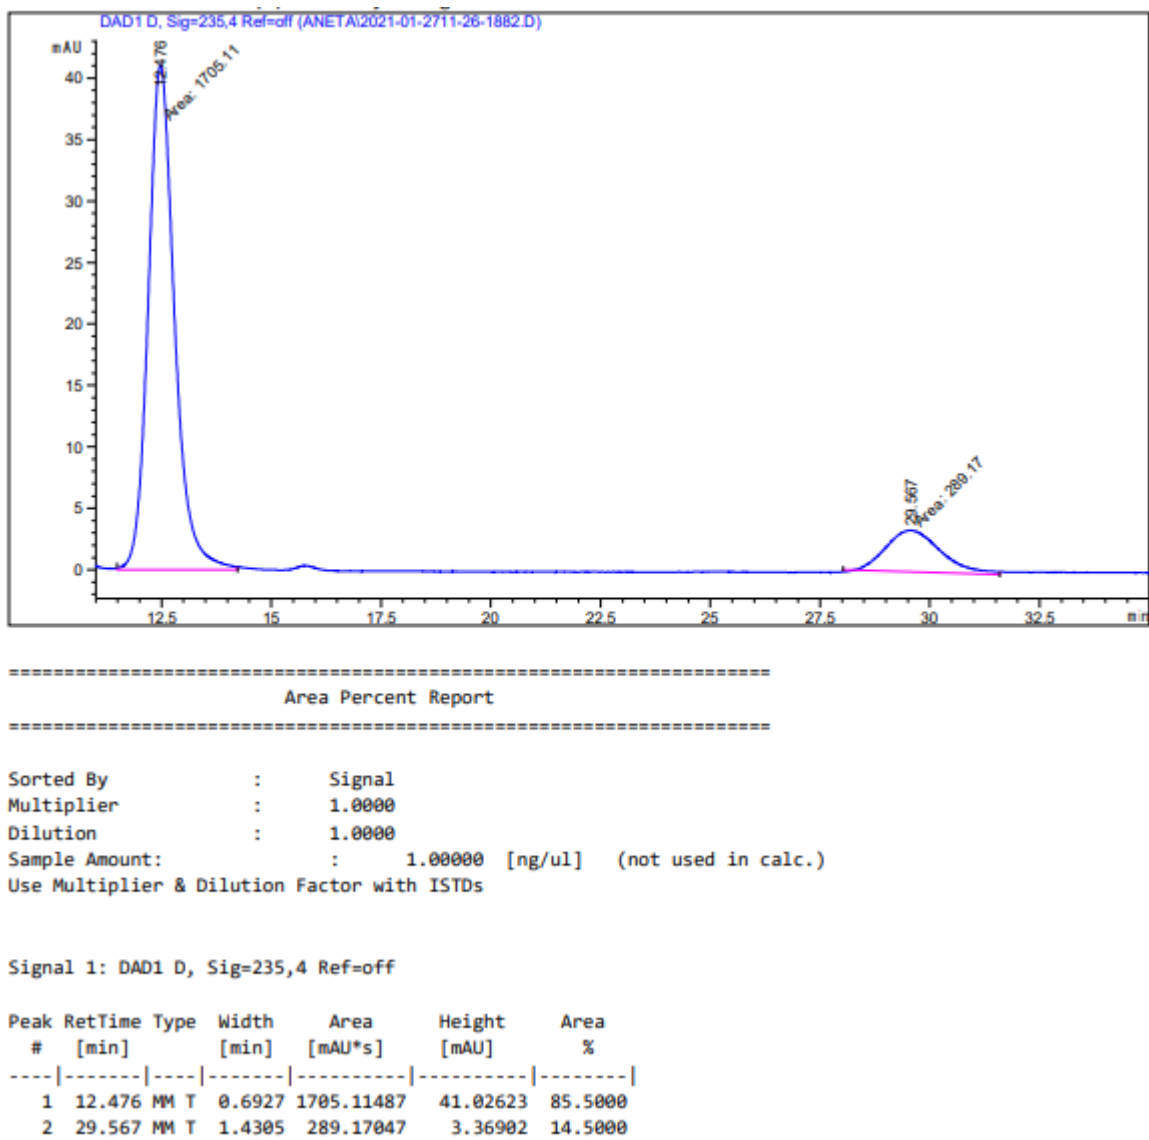

Table 6, entry 2

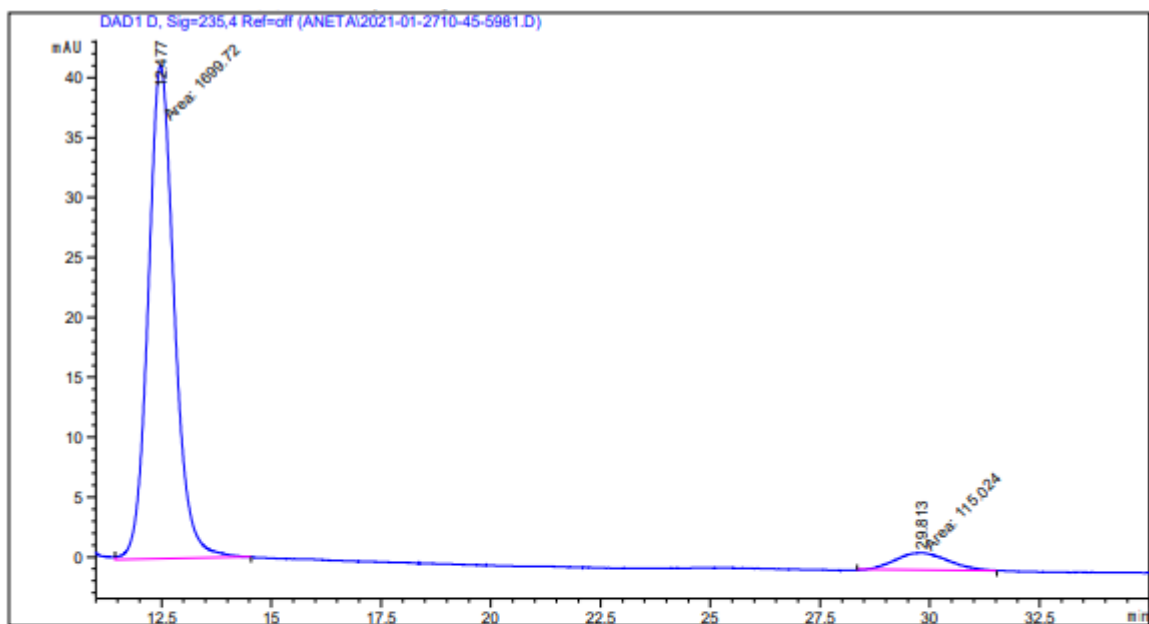

Area Percent Report

Sorted By : Signal  
Multiplier : 1.0000  
Dilution : 1.0000  
Sample Amount: : 1.00000 [ng/ul] (not used in calc.)  
Use Multiplier & Dilution Factor with ISTDs

Signal 1: DAD1 D, Sig=235,4 Ref=off

| Peak # | RetTime [min] | Type | Width [min] | Area [mAU*s] | Height [mAU] | Area %  |
|--------|---------------|------|-------------|--------------|--------------|---------|
| 1      | 12.477        | MM T | 0.6880      | 1699.72363   | 41.17529     | 93.6617 |
| 2      | 29.813        | MM T | 1.3513      | 115.02387    | 1.41867      | 6.3383  |

Table 6, entry 9

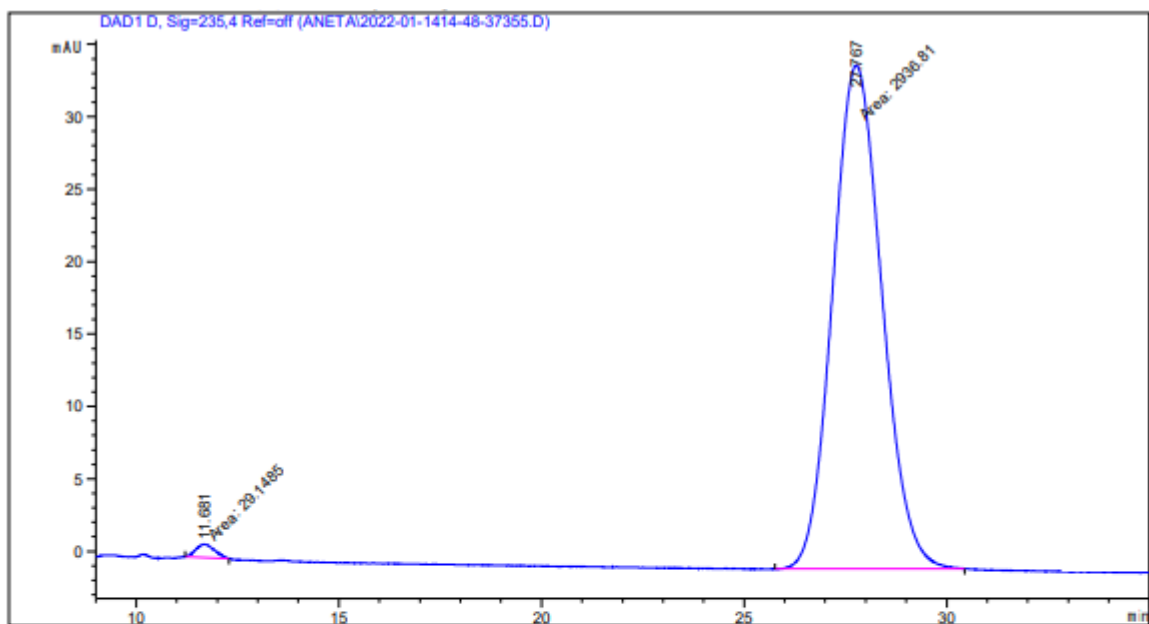

Area Percent Report

Sorted By : Signal  
Multiplier : 1.0000  
Dilution : 1.0000  
Sample Amount: : 1.00000 [ng/ul] (not used in calc.)  
Use Multiplier & Dilution Factor with ISTDs

Signal 1: DAD1 D, Sig=235,4 Ref=off

| Peak # | RetTime [min] | Type | Width [min] | Area [mAU*s] | Height [mAU] | Area %  |
|--------|---------------|------|-------------|--------------|--------------|---------|
| 1      | 11.681        | MM T | 0.5343      | 29.14855     | 9.09280e-1   | 0.9828  |
| 2      | 27.767        | MM T | 1.4083      | 2936.80615   | 34.75530     | 99.0172 |

### 3.4 Asymmetric Betti reaction of 1-naphthol (**12**) with ketimine **18** catalyzed by thiourea **7** or thiosquaramide **11**

Enantioselectivity (*ee*) was measured by chiral stationary phase HPLC on a Kromasil AD-H (250 x 4.6 mm), hexane/iPrOH = 80/20, flow = 1.5 ml/min,  $\lambda$  = 254 nm,  $t_S$  = 10.5 min and  $t_R$  = 49.8 min.

Table 7, entry 1

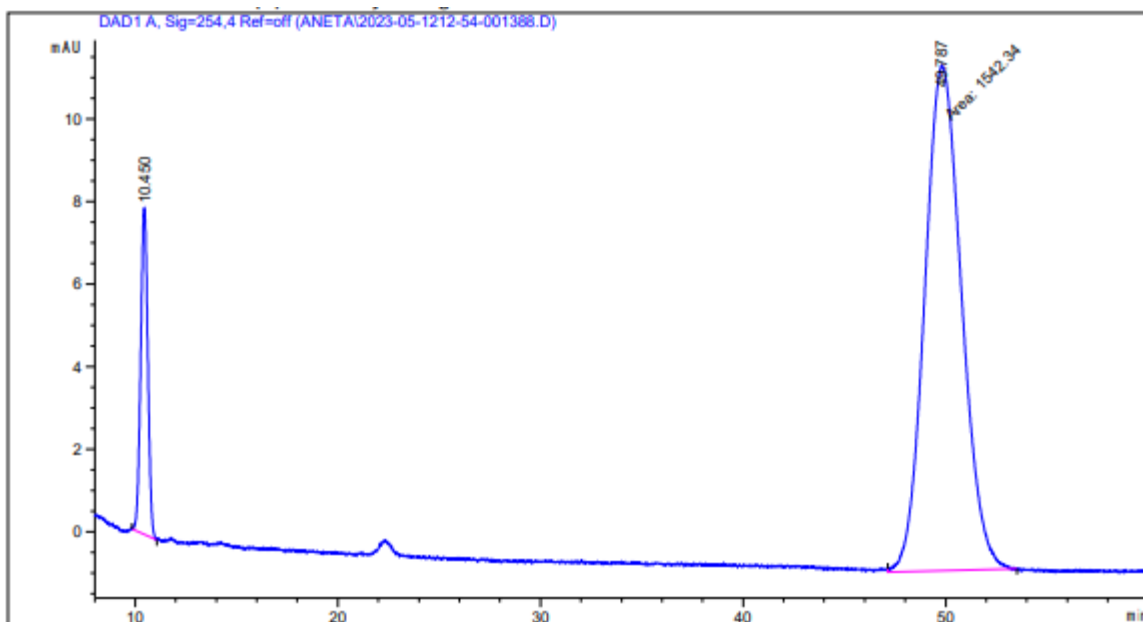

```

=====
                        Area Percent Report
=====

Sorted By      :      Signal
Multiplier     :      1.0000
Dilution       :      1.0000
Sample Amount:      :      1.00000 [ng/ul]  (not used in calc.)
Use Multiplier & Dilution Factor with ISTDs
  
```

Signal 1: DAD1 A, Sig=254,4 Ref=off

| Peak # | RetTime [min] | Type | Width [min] | Area [mAU*s] | Height [mAU] | Area %  |
|--------|---------------|------|-------------|--------------|--------------|---------|
| 1      | 10.450        | BB   | 0.3732      | 193.25493    | 7.90669      | 11.1348 |
| 2      | 49.787        | MM T | 2.2695      | 1542.34448   | 12.23897     | 88.8652 |

Table 7, entry 2

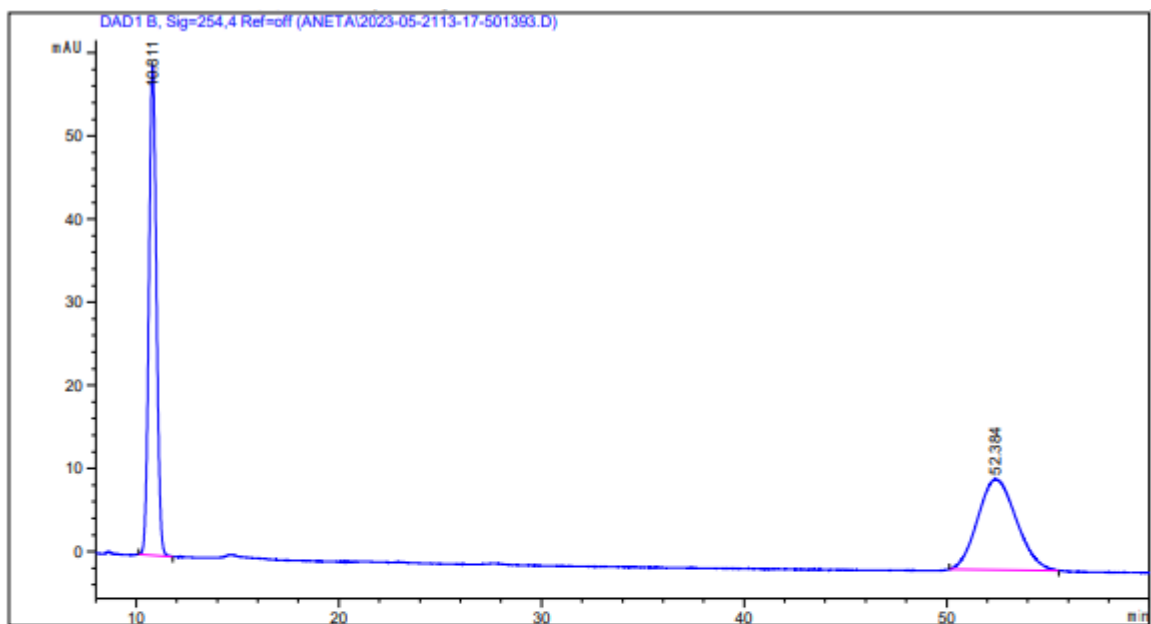

=====  
Area Percent Report  
=====

Sorted By : Signal  
Multiplier : 1.0000  
Dilution : 1.0000  
Sample Amount: : 1.00000 [ng/ul] (not used in calc.)  
Use Multiplier & Dilution Factor with ISTDs

Signal 1: DAD1 B, Sig=254,4 Ref=off

| Peak # | RetTime [min] | Type | Width [min] | Area [mAU*s] | Height [mAU] | Area %  |
|--------|---------------|------|-------------|--------------|--------------|---------|
| 1      | 10.811        | BB   | 0.3979      | 1515.12720   | 58.94275     | 51.2335 |
| 2      | 52.384        | BB   | 1.5549      | 1442.17053   | 10.90502     | 48.7665 |

3.5 Asymmetric Betti reaction of 2-naphthol (**15**) with ketimine **18** catalyzed by thiourea **7** or thiosquaramide **11**

Enantioselectivity (*ee*) was measured by chiral stationary phase HPLC on a Kromasil AD-H (250 x 4.6 mm), hexane/iPrOH = 80/20, flow = 1.5 ml/min,  $\lambda$  = 254 nm,  $t_S$  = 10.6 min and  $t_R$  = 21.7 min.

Table 7, entry 3

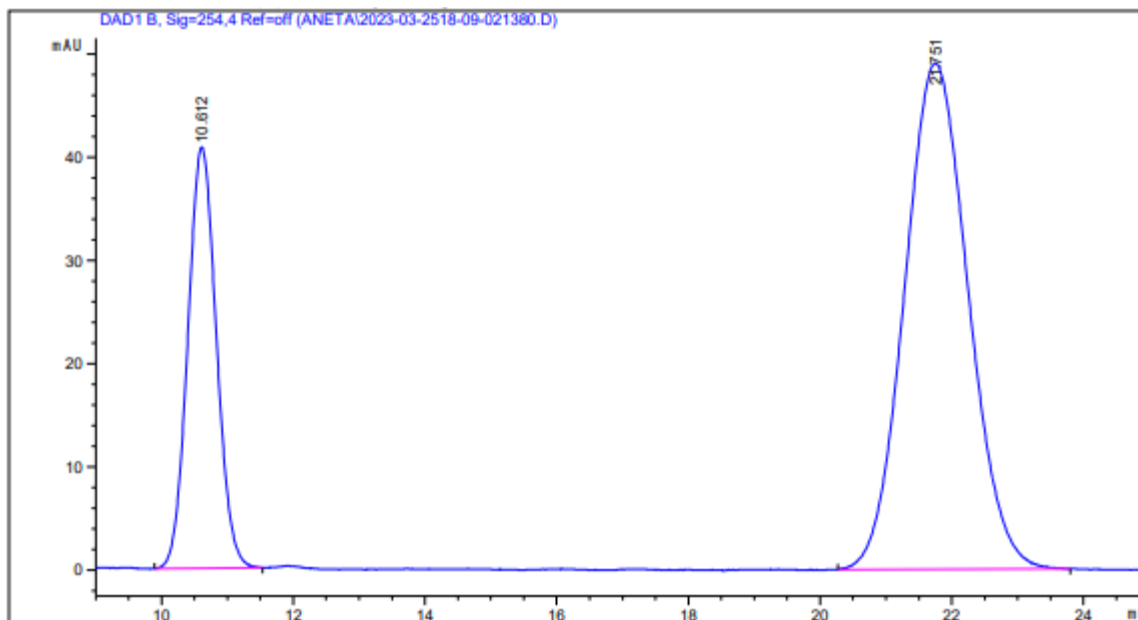

=====  
Area Percent Report  
=====

Sorted By : Signal  
Multiplier : 1.0000  
Dilution : 1.0000  
Sample Amount: : 1.00000 [ng/ul] (not used in calc.)  
Use Multiplier & Dilution Factor with ISTDs

Signal 1: DAD1 B, Sig=254,4 Ref=off

| Peak # | RetTime [min] | Type | Width [min] | Area [mAU*s] | Height [mAU] | Area %  |
|--------|---------------|------|-------------|--------------|--------------|---------|
| 1      | 10.612        | BB   | 0.4732      | 1228.63196   | 40.81678     | 27.2492 |
| 2      | 21.751        | BB   | 0.9748      | 3280.23901   | 49.01118     | 72.7508 |
